# Supplementary material for: Morbidity and mortality from road injuries: results from the Global Burden of Disease Study 2017
Source: PubMed Central journal article supplement (PMC7571357; doi:10.1136/injuryprev-2019-043302), 2020-01-08
Supplement: injuryprev-2019-043302supp003.pdf [file injuryprev-2019-043302supp003.pdf]

**Table 1: Incidence and prevalence for 2017 and percentage change of age-standardised rates between 1990 and 2017 by location for road injuries**

| Location                                                | Incidence (95% UI)         |                                         |                                                                   | Prevalence (95% UI)          |                                         |                                                                   |
|---------------------------------------------------------|----------------------------|-----------------------------------------|-------------------------------------------------------------------|------------------------------|-----------------------------------------|-------------------------------------------------------------------|
|                                                         | 2017 counts                | 2017 age-standardised rates per 100,000 | Percentage change in age-standardised rates between 1990 and 2017 | 2017 counts                  | 2017 age-standardised rates per 100,000 | Percentage change in age-standardised rates between 1990 and 2017 |
| <b>Global</b>                                           | <b>54 192 330</b>          | <b>692</b>                              | <b>11.3</b>                                                       | <b>174 209 559</b>           | <b>2 162</b>                            | <b>6.1</b>                                                        |
|                                                         | (47 381 583 to 61 645 891) | (605 to 786)                            | (6.4 to 15.8)                                                     | (162 041 952 to 187 472 078) | (2 012 to 2 326)                        | (4.4 to 7.8)                                                      |
| <b>Low SDI</b>                                          | <b>5 375 667</b>           | <b>441</b>                              | <b>5.1</b>                                                        | <b>12 631 012</b>            | <b>1 350</b>                            | <b>3.1</b>                                                        |
|                                                         | (4 618 485 to 6 300 332)   | (382 to 507)                            | (0.5 to 9.6)                                                      | (11 768 288 to 13 604 175)   | (1 257 to 1 453)                        | (1.4 to 4.7)                                                      |
| <b>Low-middle SDI</b>                                   | <b>8 877 424</b>           | <b>526</b>                              | <b>28.0</b>                                                       | <b>23 019 357</b>            | <b>1 600</b>                            | <b>25.0</b>                                                       |
|                                                         | (7 650 756 to 10 260 632)  | (456 to 601)                            | (22.4 to 33.4)                                                    | (21 410 093 to 24 775 486)   | (1 488 to 1 723)                        | (23.4 to 27.1)                                                    |
| <b>Middle SDI</b>                                       | <b>14 929 437</b>          | <b>675</b>                              | <b>53.3</b>                                                       | <b>46 704 019</b>            | <b>2 030</b>                            | <b>46.9</b>                                                       |
|                                                         | (13 032 825 to 17 017 698) | (590 to 768)                            | (17.0 to 59.4)                                                    | (43 353 475 to 50 443 635)   | (1 886 to 2 190)                        | (44.5 to 49.4)                                                    |
| <b>High-middle SDI</b>                                  | <b>14 383 420</b>          | <b>958</b>                              | <b>26.1</b>                                                       | <b>48 571 716</b>            | <b>2 801</b>                            | <b>17.0</b>                                                       |
|                                                         | (12 443 509 to 16 459 412) | (838 to 1 088)                          | (21.0 to 30.8)                                                    | (45 076 557 to 52 482 617)   | (2 604 to 3 022)                        | (15.2 to 18.7)                                                    |
| <b>High SDI</b>                                         | <b>10 350 223</b>          | <b>925</b>                              | <b>-16.5</b>                                                      | <b>42 346 323</b>            | <b>2 689</b>                            | <b>-15.8</b>                                                      |
|                                                         | (9 153 450 to 11 670 460)  | (811 to 1 072)                          | (-21.0 to -11.9)                                                  | (39 300 706 to 45 846 127)   | (2 498 to 2 913)                        | (-17.0 to -14.7)                                                  |
| <b>Central Europe, Eastern Europe, and Central Asia</b> | <b>4 923 859</b>           | <b>1 170</b>                            | <b>-12.9</b>                                                      | <b>18 465 790</b>            | <b>3 461</b>                            | <b>-12.3</b>                                                      |
|                                                         | (4 329 867 to 5 570 520)   | (1 026 to 1 340)                        | (-17.0 to -6.6)                                                   | (17 051 913 to 20 166 118)   | (3 196 to 3 771)                        | (-13.6 to -11.0)                                                  |
| <b>Central Asia</b>                                     | <b>759 348</b>             | <b>818</b>                              | <b>-5.3</b>                                                       | <b>2 078 416</b>             | <b>2 385</b>                            | <b>-6.7</b>                                                       |
|                                                         | (665 702 to 856 937)       | (722 to 920)                            | (-12.0 to 1.6)                                                    | (1 922 852 to 2 256 558)     | (2 205 to 2 591)                        | (-7.7 to -5.7)                                                    |
| <b>Armenia</b>                                          | <b>20 268</b>              | <b>654</b>                              | <b>-14.3</b>                                                      | <b>69 543</b>                | <b>1 877</b>                            | <b>-16.0</b>                                                      |
|                                                         | (17 748 to 22 866)         | (567 to 751)                            | (-20.7 to -7.1)                                                   | (64 414 to 75 333)           | (1 741 to 2 032)                        | (-17.1 to -15.0)                                                  |
| <b>Azerbaijan</b>                                       | <b>72 627</b>              | <b>685</b>                              | <b>-15.6</b>                                                      | <b>213 505</b>               | <b>1 986</b>                            | <b>-16.2</b>                                                      |
|                                                         | (62 997 to 84 136)         | (596 to 792)                            | (-23.0 to -6.1)                                                   | (197 288 to 231 133)         | (1 835 to 2 151)                        | (-18.1 to -14.5)                                                  |
| <b>Georgia</b>                                          | <b>1 039</b>               | <b>1 039</b>                            | <b>9.8</b>                                                        | <b>140 230</b>               | <b>2 925</b>                            | <b>7.8</b>                                                        |
|                                                         | (34 200 to 42 558)         | (919 to 1 158)                          | (1.8 to 18.0)                                                     | (129 273 to 153 114)         | (2 696 to 3 188)                        | (6.3 to 9.2)                                                      |
| <b>Kazakhstan</b>                                       | <b>196 365</b>             | <b>1 084</b>                            | <b>1.3</b>                                                        | <b>564 509</b>               | <b>3 078</b>                            | <b>0.4</b>                                                        |
|                                                         | (172 735 to 219 475)       | (953 to 1 218)                          | (-7.5 to 10.9)                                                    | (520 315 to 615 237)         | (2 838 to 3 349)                        | (-1.8 to 1.0)                                                     |
| <b>Kyrgyzstan</b>                                       | <b>50 019</b>              | <b>788</b>                              | <b>-19.8</b>                                                      | <b>126 026</b>               | <b>2 284</b>                            | <b>-20.4</b>                                                      |
|                                                         | (43 806 to 56 283)         | (695 to 881)                            | (-26.9 to -11.8)                                                  | (116 646 to 136 699)         | (2 113 to 2 480)                        | (-21.4 to -19.5)                                                  |
| <b>Mongolia</b>                                         | <b>31 285</b>              | <b>934</b>                              | <b>37.6</b>                                                       | <b>83 458</b>                | <b>2 751</b>                            | <b>30.5</b>                                                       |
|                                                         | (27 302 to 35 608)         | (820 to 1 061)                          | (27.4 to 49.8)                                                    | (77 193 to 90 344)           | (2 542 to 2 986)                        | (27.8 to 33.2)                                                    |
| <b>Tajikistan</b>                                       | <b>47 454</b>              | <b>515</b>                              | <b>-17.6</b>                                                      | <b>115 374</b>               | <b>1 551</b>                            | <b>-17.3</b>                                                      |
|                                                         | (41 170 to 55 096)         | (448 to 588)                            | (-24.5 to -10.3)                                                  | (105 809 to 127 835)         | (1 449 to 1 682)                        | (-18.5 to -16.2)                                                  |
| <b>Turkmenistan</b>                                     | <b>36 929</b>              | <b>725</b>                              | <b>-12.2</b>                                                      | <b>99 669</b>                | <b>2 113</b>                            | <b>-13.9</b>                                                      |
|                                                         | (31 858 to 43 047)         | (628 to 842)                            | (-20.3 to -3.5)                                                   | (91 974 to 108 293)          | (1 951 to 2 293)                        | (-15.0 to -12.6)                                                  |
| <b>Uzbekistan</b>                                       | <b>265 962</b>             | <b>802</b>                              | <b>6.1</b>                                                        | <b>667 711</b>               | <b>2 293</b>                            | <b>2.9</b>                                                        |
|                                                         | (231 341 to 303 579)       | (704 to 911)                            | (-3.6 to 16.4)                                                    | (617 655 to 724 065)         | (2 118 to 2 492)                        | (1.2 to 5.6)                                                      |
| <b>Central Europe</b>                                   | <b>1 628 842</b>           | <b>1 467</b>                            | <b>-7.2</b>                                                       | <b>6 668 038</b>             | <b>4 220</b>                            | <b>-8.0</b>                                                       |
|                                                         | (1 458 069 to 1 819 420)   | (1 297 to 1 687)                        | (-14.4 to 0.4)                                                    | (6 185 225 to 7 288 830)     | (3 904 to 6 618)                        | (-9.0 to -6.9)                                                    |
| <b>Albania</b>                                          | <b>36 354</b>              | <b>1 285</b>                            | <b>-26.4</b>                                                      | <b>128 874</b>               | <b>3 692</b>                            | <b>-21.7</b>                                                      |
|                                                         | (31 856 to 41 425)         | (1 121 to 1 488)                        | (-14.3 to 39.1)                                                   | (119 526 to 140 658)         | (3 423 to 4 030)                        | (-19.5 to 24.0)                                                   |
| <b>Bosnia and Herzegovina</b>                           | <b>41 883</b>              | <b>1 274</b>                            | <b>-74.9</b>                                                      | <b>170 361</b>               | <b>3 705</b>                            | <b>69.1</b>                                                       |
|                                                         | (37 038 to 47 354)         | (1 116 to 1 484)                        | (63.0 to 85.8)                                                    | (157 649 to 186 256)         | (3 421 to 4 054)                        | (65.5 to 73.6)                                                    |
| <b>Bulgaria</b>                                         | <b>95 174</b>              | <b>1 435</b>                            | <b>6.1</b>                                                        | <b>419 604</b>               | <b>4 105</b>                            | <b>4.3</b>                                                        |
|                                                         | (84 225 to 106 564)        | (1 243 to 1 644)                        | (-4.9 to 17.1)                                                    | (388 565 to 459 091)         | (3 792 to 4 496)                        | (2.5 to 16.1)                                                     |
| <b>Croatia</b>                                          | <b>66 672</b>              | <b>1 654</b>                            | <b>-14.2</b>                                                      | <b>284 734</b>               | <b>4 749</b>                            | <b>-12.2</b>                                                      |
|                                                         | (59 485 to 75 079)         | (1 444 to 1 920)                        | (-21.5 to -5.7)                                                   | (264 091 to 312 943)         | (4 397 to 5 249)                        | (-13.6 to -10.8)                                                  |
| <b>Czech Republic</b>                                   | <b>108 693</b>             | <b>1 711</b>                            | <b>-2.5</b>                                                       | <b>726 269</b>               | <b>4 949</b>                            | <b>-0.5</b>                                                       |
|                                                         | (149 243 to 187 385)       | (1 487 to 1 951)                        | (-12.0 to 6.9)                                                    | (673 716 to 791 332)         | (4 574 to 5 402)                        | (-2.5 to 1.3)                                                     |
| <b>Hungary</b>                                          | <b>118 866</b>             | <b>1 284</b>                            | <b>-23.5</b>                                                      | <b>504 484</b>               | <b>3 700</b>                            | <b>-22.3</b>                                                      |
|                                                         | (105 802 to 133 375)       | (1 118 to 1 502)                        | (-30.8 to -16.4)                                                  | (466 719 to 551 937)         | (3 417 to 4 050)                        | (-23.7 to -20.9)                                                  |
| <b>Macedonia</b>                                        | <b>26 616</b>              | <b>1 244</b>                            | <b>16.3</b>                                                       | <b>101 669</b>               | <b>3 606</b>                            | <b>12.8</b>                                                       |
|                                                         | (23 377 to 30 016)         | (1 084 to 1 436)                        | (7.8 to 26.0)                                                     | (94 054 to 111 451)          | (3 329 to 3 953)                        | (11.2 to 14.6)                                                    |
| <b>Montenegro</b>                                       | <b>8 790</b>               | <b>1 412</b>                            | <b>5.3</b>                                                        | <b>32 575</b>                | <b>4 052</b>                            | <b>4.5</b>                                                        |
|                                                         | (7 177 to 9 942)           | (1 231 to 1 630)                        | (-3.8 to 15.6)                                                    | (30 218 to 35 540)           | (3 751 to 4 430)                        | (3.0 to 5.9)                                                      |
| <b>Poland</b>                                           | <b>587 099</b>             | <b>1 575</b>                            | <b>-8.4</b>                                                       | <b>2 368 187</b>             | <b>4 517</b>                            | <b>-8.8</b>                                                       |
|                                                         | (523 266 to 657 285)       | (1 385 to 1 812)                        | (-17.2 to 1.1)                                                    | (2 197 814 to 2 588 866)     | (4 179 to 4 949)                        | (-10.1 to -7.3)                                                   |
| <b>Romania</b>                                          | <b>262 309</b>             | <b>1 375</b>                            | <b>-8.1</b>                                                       | <b>1 062 776</b>             | <b>3 900</b>                            | <b>-10.4</b>                                                      |
|                                                         | (234 312 to 291 214)       | (1 207 to 1 574)                        | (-15.6 to 1.9)                                                    | (984 963 to 1 160 111)       | (3 613 to 4 263)                        | (-12.2 to -8.7)                                                   |
| <b>Serbia</b>                                           | <b>110 270</b>             | <b>1 261</b>                            | <b>-15.5</b>                                                      | <b>428 949</b>               | <b>3 611</b>                            | <b>-17.6</b>                                                      |
|                                                         | (98 763 to 123 763)        | (1 106 to 1 457)                        | (-24.4 to -6.2)                                                   | (397 457 to 468 195)         | (3 342 to 3 949)                        | (-18.8 to -16.4)                                                  |
| <b>Slovakia</b>                                         | <b>74 154</b>              | <b>1 418</b>                            | <b>-20.0</b>                                                      | <b>296 765</b>               | <b>4 099</b>                            | <b>-19.0</b>                                                      |
|                                                         | (65 623 to 83 358)         | (1 240 to 1 639)                        | (-29.2 to -9.0)                                                   | (274 969 to 325 244)         | (3 789 to 4 494)                        | (-20.2 to -17.5)                                                  |
| <b>Slovenia</b>                                         | <b>32 023</b>              | <b>1 680</b>                            | <b>-26.5</b>                                                      | <b>142 839</b>               | <b>4 893</b>                            | <b>-23.4</b>                                                      |
|                                                         | (28 280 to 36 139)         | (1 456 to 1 933)                        | (-34.4 to -20.0)                                                  | (132 582 to 155 753)         | (4 517 to 5 339)                        | (-25.0 to -21.9)                                                  |
| <b>Eastern Europe</b>                                   | <b>2 535 669</b>           | <b>1 193</b>                            | <b>-12.5</b>                                                      | <b>9 719 337</b>             | <b>3 414</b>                            | <b>-12.9</b>                                                      |
|                                                         | (2 164 640 to 2 934 117)   | (1 022 to 1 405)                        | (-16.8 to -8.4)                                                   | (8 940 040 to 10 647 866)    | (3 137 to 3 738)                        | (-14.6 to -11.0)                                                  |
| <b>Belarus</b>                                          | <b>100 142</b>             | <b>1 052</b>                            | <b>-16.3</b>                                                      | <b>386 591</b>               | <b>2 988</b>                            | <b>-17.0</b>                                                      |
|                                                         | (88 843 to 113 176)        | (918 to 1 202)                          | (-25.5 to -5.8)                                                   | (358 358 to 421 610)         | (2 769 to 3 253)                        | (-18.6 to -15.6)                                                  |
| <b>Estonia</b>                                          | <b>13 599</b>              | <b>1 074</b>                            | <b>-29.5</b>                                                      | <b>57 288</b>                | <b>3 103</b>                            | <b>-28.2</b>                                                      |
|                                                         | (11 853 to 15 520)         | (924 to 1 254)                          | (-37.5 to -20.9)                                                  | (52 969 to 62 633)           | (2 865 to 3 521)                        | (-29.4 to -26.9)                                                  |
| <b>Latvia</b>                                           | <b>21 609</b>              | <b>1 143</b>                            | <b>-31.5</b>                                                      | <b>90 654</b>                | <b>3 237</b>                            | <b>-31.0</b>                                                      |
|                                                         | (18 970 to 24 426)         | (992 to 1 311)                          | (-38.7 to -24.6)                                                  | (83 894 to 99 127)           | (2 986 to 3 542)                        | (-32.1 to -30.0)                                                  |
| <b>Lithuania</b>                                        | <b>34 454</b>              | <b>1 212</b>                            | <b>-22.6</b>                                                      | <b>140 291</b>               | <b>3 415</b>                            | <b>-22.5</b>                                                      |
|                                                         | (30 264 to 38 650)         | (1 051 to 1 397)                        | (-31.0 to -13.1)                                                  | (129 970 to 153 982)         | (3 159 to 3 748)                        | (-23.8 to -20.9)                                                  |
| <b>Moldova</b>                                          | <b>33 474</b>              | <b>884</b>                              | <b>-30.4</b>                                                      | <b>123 859</b>               | <b>2 543</b>                            | <b>-31.5</b>                                                      |
|                                                         | (29 335 to 37 731)         | (771 to 1 012)                          | (-37.0 to -22.0)                                                  | (114 426 to 134 541)         | (2 353 to 2 758)                        | (-32.5 to -30.4)                                                  |
| <b>Russian Federation</b>                               | <b>1 815 796</b>           | <b>1 218</b>                            | <b>-14.2</b>                                                      | <b>6 856 229</b>             | <b>3 493</b>                            | <b>-14.5</b>                                                      |
|                                                         | (1 542 761 to 2 111 685)   | (1 036 to 1 434)                        | (-18.3 to -1.7)                                                   | (6 309 419 to 7 521 276)     | (3 210 to 3 828)                        | (-16.5 to -12.3)                                                  |
| <b>Ukraine</b>                                          | <b>516 594</b>             | <b>1 177</b>                            | <b>-1.9</b>                                                       | <b>2 064 424</b>             | <b>3 354</b>                            | <b>-3.2</b>                                                       |
|                                                         | (438 209 to 602 891)       | (997 to 1 397)                          | (-7.8 to 3.9)                                                     | (1 892 239 to 2 260 648)     | (3 078 to 3 670)                        | (-4.6 to -1.7)                                                    |
| <b>High-income</b>                                      | <b>8 841 525</b>           | <b>840</b>                              | <b>-19.9</b>                                                      | <b>36 168 567</b>            | <b>2 462</b>                            | <b>-19.2</b>                                                      |
|                                                         | (7 810 602 to 10 005 336)  | (737 to 975)                            | (-24.0 to -15.6)                                                  | (33 543 888 to 39 185 495)   | (2 286 to 2 672)                        | (-20.3 to -18.2)                                                  |
| <b>Australasia</b>                                      | <b>365 586</b>             | <b>1 304</b>                            | <b>-20.3</b>                                                      | <b>1 413 829</b>             | <b>3 825</b>                            | <b>-19.3</b>                                                      |
|                                                         | (326 635 to 409 673)       | (1 157 to 1 480)                        | (-25.6 to -14.6)                                                  | (1 309 726 to 1 533 369)     | (3 541 to 4 145)                        | (-20.9 to -18.1)                                                  |
| <b>Australia</b>                                        | <b>285 446</b>             | <b>1 214</b>                            | <b>-23.2</b>                                                      | <b>1 111 015</b>             | <b>3 579</b>                            | <b>-21.8</b>                                                      |
|                                                         | (251 293 to 324 837)       | (1 058 to 1 401)                        | (-30.3 to -15.7)                                                  | (1 028 964 to 1 203 990)     | (3 315 to 3 882)                        | (-23.6 to -20.3)                                                  |
| <b>New Zealand</b>                                      | <b>80 140</b>              | <b>1 798</b>                            | <b>-5.9</b>                                                       | <b>302 814</b>               | <b>5 166</b>                            | <b>-7.5</b>                                                       |
|                                                         | (74 271 to 86 535)         | (1 656 to 1 960)                        | (-11.9 to 0.5)                                                    | (279 258 to 328 615)         | (4 760 to 5 603)                        | (-9.1 to -6.2)                                                    |
| <b>High-income Asia-Pacific</b>                         | <b>1 335 884</b>           | <b>686</b>                              | <b>-28.3</b>                                                      | <b>5 792 577</b>             | <b>2 011</b>                            | <b>-24.0</b>                                                      |
|                                                         | (1 176 156 to 1 502 607)   | (594 to 806)                            | (-33.2 to -23.5)                                                  | (5 400 516 to 6 282 687)     | (1 868 to 2 178)                        | (-25.5 to -22.5)                                                  |
| <b>Brunei</b>                                           | <b>4 670</b>               | <b>1 054</b>                            | <b>-28.3</b>                                                      | <b>12 145</b>                | <b>2 898</b>                            | <b>-29.1</b>                                                      |
|                                                         | (4 053 to 5 289)           | (927 to 1 181)                          | (-34.5 to -21.5)                                                  | (11 302 to 13 097)           | (2 703 to 3 125)                        | (-30.2 to -28.2)                                                  |
| <b>Japan</b>                                            | <b>859 900</b>             | <b>664</b>                              | <b>-22.7</b>                                                      | <b>4 113 325</b>             | <b>2 002</b>                            | <b>-18.0</b>                                                      |
|                                                         | (745 042 to 973 415)       | (566 to 791)                            | (-27.7 to -17.5)                                                  | (3 829 491 to 4 464 379)     | (1 859 to 2 167)                        | (-20.0 to -15.9)                                                  |
| <b>South Korea</b>                                      | <b>433 491</b>             | <b>757</b>                              | <b>-40.6</b>                                                      | <b>1 529 429</b>             | <b>2 086</b>                            | <b>-40.7</b>                                                      |
|                                                         | (387 384 to 487 353)       | (667 to 871)                            | (-46.6 to -33.3)                                                  | (1 429 084 to 1 655 718)     | (1 950 to 2 257)                        | (-41.8 to -39.6)                                                  |
| <b>Singapore</b>                                        | <b>37 742</b>              | <b>681</b>                              | <b>-7.3</b>                                                       | <b>137 479</b>               | <b>2 026</b>                            | <b>-2.0</b>                                                       |
|                                                         | (32 788 to 43 547)         | (587 to 807)                            | (-16.1 to 1.0)                                                    | (127 554 to 148 350)         | (1 879 to 2 185)                        | (-4.7 to 0.9)                                                     |
| <b>High-income North America</b>                        | <b>3 399 537</b>           | <b>950</b>                              | <b>-21.7</b>                                                      | <b>13 171 952</b>            | <b>2 806</b>                            | <b>-22.3</b>                                                      |
|                                                         | (2 941 015 to 3 919 587)   | (814 to 1 115)                          | (-25.8 to -17.6)                                                  | (12 026 067 to 14 553 077)   | (2 558 to 3 106)                        | (-23.7 to -20.5)                                                  |
| <b>Canada</b>                                           | <b>255 577</b>             | <b>865</b>                              | <b>-24.2</b>                                                      | <b>1 217 167</b>             | <b>2 533</b>                            | <b>-22.8</b>                                                      |
|                                                         | (257 524 to 329 723)       | (754 to 1 013)                          | (-32.0 to -15.4)                                                  | (1 121 708 to 1 330 128)     | (2 333 to 2 772)                        | (-24.5 to -21.4)                                                  |
| <b>Greenland</b>                                        | <b>272</b>                 | <b>495</b>                              | <b>-23.9</b>                                                      | <b>956</b>                   | <b>1 466</b>                            | <b>-25.1</b>                                                      |
|                                                         | (236 to 316)               | (425 to 587)                            | (-30.5 to -16.8)                                                  | (882 to 1 042)               | (1                                      |                                                                   |

| Location                           | Incidence (95% UI)                                  |                                         |                                                                   | Prevalence (95% UI)                                    |                                         |                                                                   |
|------------------------------------|-----------------------------------------------------|-----------------------------------------|-------------------------------------------------------------------|--------------------------------------------------------|-----------------------------------------|-------------------------------------------------------------------|
|                                    | 2017 counts                                         | 2017 age-standardised rates per 100,000 | Percentage change in age-standardised rates between 1990 and 2017 | 2017 counts                                            | 2017 age-standardised rates per 100,000 | Percentage change in age-standardised rates between 1990 and 2017 |
| Uruguay                            | 27 386<br>(24 186 to 30 631)                        | 790<br>(693 to 896)                     | 50.7<br>(37.5 to 65.9)                                            | 94 455<br>(87 817 to 102 133)                          | 2 241<br>(2 085 to 2 416)               | 44.9<br>(41.2 to 48.5)                                            |
| <b>Western Europe</b>              | <b>3 279 986</b><br><b>(2 912 763 to 3 707 329)</b> | <b>803</b><br><b>(699 to 939)</b>       | <b>-21.1</b><br><b>(-27.3 to -15.0)</b>                           | <b>14 332 131</b><br><b>(13 309 926 to 15 526 258)</b> | <b>2 378</b><br><b>(2 203 to 2 573)</b> | <b>-19.0</b><br><b>(-20.7 to -17.6)</b>                           |
| Andorra                            | 669<br>(589 to 762)                                 | 893<br>(772 to 1 045)                   | -1.6<br>(-9.4 to 6.4)                                             | 2 906<br>(2 697 to 3 161)                              | 2 654<br>(2 454 to 2 880)               | 0.0<br>(-1.4 to 1.3)                                              |
| Austria                            | 66 018<br>(59 892 to 77 750)                        | 836<br>(718 to 985)                     | -23.9<br>(-32.2 to -14.8)                                         | 302 178<br>(280 951 to 328 511)                        | 2 483<br>(2 296 to 2 699)               | -20.9<br>(-23.2 to -19.0)                                         |
| Belgium                            | 88 023<br>(78 734 to 98 989)                        | 794<br>(694 to 915)                     | -30.3<br>(-36.9 to -22.9)                                         | 361 442<br>(335 975 to 391 875)                        | 2 311<br>(2 142 to 2 500)               | -29.2<br>(-31.3 to -27.4)                                         |
| Cyprus                             | 13 212<br>(11 741 to 14 867)                        | 1 050<br>(921 to 1 221)                 | -22.9<br>(-31.1 to -14.4)                                         | 49 232<br>(45 667 to 53 358)                           | 3 049<br>(2 826 to 3 303)               | -22.6<br>(-24.0 to -21.4)                                         |
| Denmark                            | 43 292<br>(38 055 to 49 758)                        | 808<br>(696 to 960)                     | -18.9<br>(-27.5 to -10.3)                                         | 184 313<br>(170 906 to 199 986)                        | 2 402<br>(2 222 to 2 604)               | -16.2<br>(-17.7 to -14.7)                                         |
| Finland                            | 44 338<br>(39 083 to 50 521)                        | 865<br>(751 to 1 016)                   | -7.0<br>(-16.1 to 2.1)                                            | 197 040<br>(183 371 to 214 406)                        | 2 570<br>(2 373 to 2 793)               | -3.7<br>(-4.9 to -2.4)                                            |
| France                             | 540 656<br>(477 251 to 615 954)                     | 882<br>(768 to 1 032)                   | -25.4<br>(-32.8 to -17.8)                                         | 2 309 036<br>(2 148 566 to 2 506 643)                  | 2 617<br>(2 428 to 2 839)               | -23.3<br>(-25.9 to -21.1)                                         |
| Germany                            | 623 851<br>(548 376 to 711 948)                     | 820<br>(702 to 968)                     | -18.4<br>(-26.7 to -9.5)                                          | 2 902 944<br>(2 694 020 to 3 149 456)                  | 2 429<br>(2 247 to 2 632)               | -16.3<br>(-18.3 to -14.6)                                         |
| Greece                             | 103 199<br>(91 742 to 115 242)                      | 1 044<br>(916 to 1 210)                 | -12.3<br>(-20.1 to -3.6)                                          | 468 839<br>(436 740 to 508 641)                        | 3 051<br>(2 833 to 2 999)               | -10.8<br>(-12.6 to -9.3)                                          |
| Iceland                            | 2 616<br>(2 286 to 3 015)                           | 805<br>(689 to 950)                     | -9.9<br>(-18.0 to -0.9)                                           | 9 953<br>(9 224 to 10 774)                             | 2 397<br>(2 192 to 2 591)               | -7.3<br>(-9.5 to -5.6)                                            |
| Ireland                            | 36 379<br>(31 497 to 42 515)                        | 790<br>(675 to 941)                     | -12.0<br>(-21.0 to -0.9)                                          | 138 737<br>(128 464 to 150 663)                        | 2 354<br>(2 173 to 2 551)               | -8.7<br>(-10.4 to -7.0)                                           |
| Israel                             | 69 443<br>(60 792 to 80 687)                        | 783<br>(682 to 915)                     | -6.1<br>(-15.1 to 3.1)                                            | 219 581<br>(204 030 to 237 948)                        | 2 274<br>(2 110 to 2 463)               | -5.3<br>(-7.0 to -3.8)                                            |
| Italy                              | 493 255<br>(446 890 to 543 000)                     | 830<br>(732 to 943)                     | -24.4<br>(-30.6 to -17.7)                                         | 2 203 371<br>(2 054 997 to 2 382 958)                  | 2 403<br>(2 237 to 2 594)               | -22.7<br>(-24.0 to -21.3)                                         |
| Luxembourg                         | 5 586<br>(4 890 to 6 364)                           | 975<br>(847 to 1 143)                   | -18.7<br>(-28.5 to -9.4)                                          | 22 208<br>(20 647 to 24 128)                           | 2 883<br>(2 673 to 3 129)               | -16.4<br>(-19.1 to -14.2)                                         |
| Malta                              | 2 835<br>(2 496 to 3 226)                           | 719<br>(621 to 843)                     | 10.6<br>(1.8 to 19.8)                                             | 12 939<br>(12 031 to 13 990)                           | 2 147<br>(1 991 to 2 319)               | 13.9<br>(12.3 to 15.6)                                            |
| Netherlands                        | 112 157<br>(104 349 to 121 958)                     | 695<br>(638 to 769)                     | -17.3<br>(-24.9 to -8.7)                                          | 470 159<br>(438 032 to 506 556)                        | 2 035<br>(1 890 to 2 190)               | -15.7<br>(-18.1 to -13.3)                                         |
| Norway                             | 37 682<br>(32 398 to 43 940)                        | 742<br>(629 to 889)                     | -4.2<br>(-9.2 to 4.4)                                             | 155 360<br>(143 705 to 169 408)                        | 2 263<br>(2 089 to 2 462)               | -1.7<br>(-3.7 to 0.6)                                             |
| Portugal                           | 81 004<br>(72 071 to 91 485)                        | 768<br>(667 to 894)                     | -28.9<br>(-45.5 to -12.9)                                         | 354 662<br>(329 629 to 384 046)                        | 2 738<br>(2 079 to 2 419)               | -35.5<br>(-40.9 to -36.6)                                         |
| Spain                              | 368 356<br>(324 617 to 419 664)                     | 855<br>(738 to 1 010)                   | -26.0<br>(-33.6 to -17.1)                                         | 1 661 725<br>(1 541 448 to 1 802 218)                  | 2 540<br>(2 352 to 2 750)               | -23.4<br>(-25.8 to -21.4)                                         |
| Sweden                             | 65 182<br>(56 194 to 75 588)                        | 690<br>(586 to 792)                     | -13.0<br>(-18.6 to -7.4)                                          | 286 076<br>(264 406 to 310 997)                        | 2 117<br>(1 951 to 2 297)               | -10.7<br>(-12.5 to -9.0)                                          |
| Switzerland                        | 67 985<br>(61 335 to 75 217)                        | 824<br>(732 to 948)                     | -20.7<br>(-27.2 to -13.8)                                         | 289 283<br>(269 723 to 312 082)                        | 2 409<br>(2 239 to 2 594)               | -19.6<br>(-21.0 to -18.3)                                         |
| United Kingdom                     | 408 849<br>(351 584 to 476 468)                     | 652<br>(556 to 784)                     | -10.7<br>(-16.1 to -5.2)                                          | 1 715 296<br>(1 587 660 to 1 865 592)                  | 1 955<br>(1 807 to 2 124)               | -8.5<br>(-10.1 to -7.0)                                           |
| <b>Latin America and Caribbean</b> | <b>2 420 944</b><br><b>(2 125 463 to 2 732 730)</b> | <b>406</b><br><b>(356 to 457)</b>       | <b>31.1</b><br><b>(25.3 to 36.7)</b>                              | <b>7 020 885</b><br><b>(6 520 321 to 7 519 492)</b>    | <b>1 178</b><br><b>(1 096 to 1 262)</b> | <b>29.1</b><br><b>(25.6 to 32.7)</b>                              |
| <b>Andean Latin America</b>        | <b>194 102</b><br><b>(170 730 to 216 867)</b>       | <b>321</b><br><b>(284 to 358)</b>       | <b>18.4</b><br><b>(9.7 to 27.4)</b>                               | <b>518 087</b><br><b>(485 803 to 552 945)</b>          | <b>903</b><br><b>(847 to 963)</b>       | <b>11.3</b><br><b>(9.4 to 13.0)</b>                               |
| Bolivia                            | 31 319<br>(27 214 to 35 937)                        | 289<br>(252 to 329)                     | -3.9<br>(-11.8 to 4.4)                                            | 79 987<br>(74 978 to 85 493)                           | 821<br>(771 to 877)                     | -9.4<br>(-11.5 to -7.2)                                           |
| Ecuador                            | 65 229<br>(57 960 to 74 230)                        | 400<br>(352 to 446)                     | 27.8<br>(15.6 to 41.3)                                            | 175 503<br>(164 222 to 187 216)                        | 1 117<br>(1 045 to 1 192)               | 21.3<br>(18.7 to 23.9)                                            |
| Peru                               | 96 554<br>(84 405 to 108 468)                       | 293<br>(256 to 330)                     | 20.1<br>(9.7 to 31.7)                                             | 262 597<br>(246 143 to 280 722)                        | 823<br>(771 to 880)                     | 11.8<br>(9.8 to 13.6)                                             |
| <b>Caribbean</b>                   | <b>151 296</b><br><b>(132 325 to 170 382)</b>       | <b>319</b><br><b>(278 to 359)</b>       | <b>17.2</b><br><b>(8.5 to 26.0)</b>                               | <b>450 765</b><br><b>(419 736 to 485 368)</b>          | <b>906</b><br><b>(844 to 975)</b>       | <b>11.2</b><br><b>(10.2 to 12.5)</b>                              |
| Antigua and Barbuda                | 231<br>(201 to 262)                                 | 254<br>(222 to 293)                     | 18.0<br>(7.9 to 28.7)                                             | 741<br>(692 to 796)                                    | 731<br>(682 to 785)                     | 17.6<br>(15.3 to 20.0)                                            |
| The Bahamas                        | 1 213<br>(1 060 to 1 370)                           | 313<br>(274 to 353)                     | 2.4<br>(-6.4 to 12.1)                                             | 3 576<br>(3 328 to 3 853)                              | 885<br>(825 to 951)                     | 2.1<br>(1.0 to 3.2)                                               |
| Barbados                           | 860<br>(755 to 961)                                 | 284<br>(245 to 322)                     | 21.1<br>(10.2 to 32.1)                                            | 3 149<br>(2 948 to 3 402)                              | 805<br>(752 to 867)                     | 21.1<br>(18.7 to 23.4)                                            |
| Belize                             | 1 249<br>(1 088 to 1 419)                           | 319<br>(280 to 358)                     | 22.6<br>(12.1 to 34.9)                                            | 3 075<br>(2 858 to 3 310)                              | 938<br>(872 to 1 013)                   | 20.3<br>(18.5 to 22.3)                                            |
| Bermuda                            | 272<br>(241 to 306)                                 | 405<br>(354 to 467)                     | -0.3<br>(-9.9 to 9.3)                                             | 4 091<br>(1 012 to 1 175)                              | 1 145<br>(1 067 to 1 235)               | 2.1<br>(-1.4 to 6.1)                                              |
| Cuba                               | 29 644<br>(26 125 to 33 042)                        | 248<br>(216 to 283)                     | -16.2<br>(-25.0 to -7.8)                                          | 107 278<br>(100 090 to 115 621)                        | 693<br>(645 to 745)                     | -19.4<br>(-21.2 to -17.8)                                         |
| Dominica                           | 206<br>(182 to 231)                                 | 288<br>(251 to 323)                     | 32.3<br>(19.6 to 45.9)                                            | 679<br>(633 to 729)                                    | 836<br>(778 to 899)                     | 34.7<br>(32.9 to 36.6)                                            |
| Dominican Republic                 | 51 695<br>(45 152 to 58 133)                        | 488<br>(428 to 545)                     | 83.7<br>(65.1 to 103.9)                                           | 137 379<br>(127 517 to 148 529)                        | 1 373<br>(1 273 to 1 486)               | 69.6<br>(66.8 to 72.6)                                            |
| Grenada                            | 262<br>(228 to 295)                                 | 278<br>(196 to 259)                     | 12.1<br>(1.4 to 24.6)                                             | 871<br>(817 to 937)                                    | 670<br>(628 to 721)                     | 13.0<br>(10.6 to 15.3)                                            |
| Guyana                             | 1 825<br>(1 579 to 2 081)                           | 245<br>(214 to 278)                     | 40.2<br>(24.0 to 56.0)                                            | 5 014<br>(4 653 to 5 397)                              | 720<br>(669 to 774)                     | 36.8<br>(34.4 to 38.9)                                            |
| Haiti                              | 28 760<br>(24 235 to 33 719)                        | 255<br>(218 to 293)                     | -3.8<br>(-11.1 to 4.6)                                            | 71 792<br>(66 846 to 76 834)                           | 779<br>(727 to 837)                     | -8.0<br>(-10.1 to -6.2)                                           |
| Jamaica                            | 7 785<br>(6 712 to 8 941)                           | 267<br>(232 to 307)                     | 93.2<br>(78.4 to 112.5)                                           | 22 749<br>(21 192 to 24 492)                           | 773<br>(720 to 832)                     | 87.1<br>(83.2 to 91.4)                                            |
| Puerto Rico                        | 14 014<br>(12 413 to 15 742)                        | 363<br>(316 to 418)                     | 8.0<br>(-1.7 to 18.0)                                             | 51 871<br>(48 483 to 56 062)                           | 1 016<br>(948 to 1 094)                 | 6.0<br>(6.0 to 10.4)                                              |
| Saint Lucia                        | 528<br>(463 to 596)                                 | 286<br>(250 to 325)                     | 7.4<br>(-2.6 to 18.3)                                             | 1 681<br>(1 569 to 1 814)                              | 825<br>(770 to 889)                     | 6.3<br>(5.1 to 7.5)                                               |
| Saint Vincent and the Grenadines   | 270<br>(235 to 305)                                 | 231<br>(199 to 264)                     | 41.3<br>(26.9 to 56.7)                                            | 883<br>(823 to 949)                                    | 686<br>(640 to 737)                     | 43.3<br>(40.7 to 46.1)                                            |
| Suriname                           | 1 922<br>(1 682 to 2 177)                           | 331<br>(290 to 376)                     | 19.8<br>(7.9 to 32.5)                                             | 5 727<br>(5 328 to 6 175)                              | 955<br>(889 to 1 031)                   | 16.4<br>(15.2 to 17.8)                                            |
| Trinidad and Tobago                | 4 744<br>(4 187 to 5 332)                           | 328<br>(288 to 371)                     | 28.8<br>(16.9 to 43.3)                                            | 15 653<br>(14 623 to 16 934)                           | 935<br>(874 to 1 008)                   | 26.8<br>(25.0 to 28.9)                                            |
| Virgin Islands                     | 376<br>(334 to 419)                                 | 337<br>(294 to 381)                     | -21.1<br>(-11.7 to 31.2)                                          | 1 347<br>(1 258 to 1 456)                              | 925<br>(866 to 997)                     | 16.3<br>(14.5 to 18.1)                                            |
| <b>Central Latin America</b>       | <b>983 527</b><br><b>(855 913 to 1 116 551)</b>     | <b>384</b><br><b>(334 to 436)</b>       | <b>17.3</b><br><b>(11.7 to 22.9)</b>                              | <b>2 707 080</b><br><b>(2 524 017 to 2 897 252)</b>    | <b>1 092</b><br><b>(1 019 to 1 169)</b> | <b>14.4</b><br><b>(12.7 to 16.4)</b>                              |
| Colombia                           | 146 782<br>(128 483 to 165 597)                     | 284<br>(247 to 320)                     | -8.6<br>(-16.2 to -1.0)                                           | 416 002<br>(390 216 to 446 029)                        | 780<br>(732 to 836)                     | -11.5<br>(-14.0 to -9.4)                                          |
| Costa Rica                         | 14 014<br>(15 088 to 19 127)                        | 363<br>(312 to 396)                     | 8.0<br>(4.9 to 28.1)                                              | 49 087<br>(45 092 to 51 268)                           | 963<br>(903 to 1 026)                   | 14.4<br>(13.1 to 15.7)                                            |
| El Salvador                        | 17 591<br>(15 611 to 19 763)                        | 295<br>(263 to 331)                     | 7.0<br>(-4.0 to 18.8)                                             | 45 555<br>(42 602 to 48 684)                           | 781<br>(730 to 836)                     | -0.7<br>(-2.7 to 1.2)                                             |
| Guatemala                          | 38 593<br>(33 078 to 44 513)                        | 251<br>(218 to 282)                     | 25.2<br>(15.2 to 36.9)                                            | 90 799<br>(84 936 to 97 345)                           | 700<br>(656 to 749)                     | 18.2<br>(16.5 to 19.8)                                            |
| Honduras                           | 23 900<br>(20 626 to 27 233)                        | 284<br>(247 to 321)                     | 35.4<br>(24.0 to 45.9)                                            | 57 310<br>(53 678 to 61 415)                           | 804<br>(752 to 861)                     | 28.4<br>(25.7 to 30.9)                                            |
| Mexico                             | 587 603<br>(507 029 to 675 684)                     | 461<br>(399 to 528)                     | 35.9<br>(29.1 to 42.6)                                            | 1 639 241<br>(1 522 198 to 1 763 199)                  | 1 325<br>(1 232 to 1 426)               | 32.1<br>(29.5 to 35.3)                                            |
| Nicaragua                          | 12 883<br>(11 240 to 14 728)                        | 212<br>(186 to 240)                     | -13.4<br>(-21.5 to -4.2)                                          | 31 598<br>(29 629 to 33 780)                           | 592<br>(556 to 633)                     | -17.8<br>(-19.3 to -16.2)                                         |

| Location                                      | Incidence (95% UI)                               |                                         |                                                                   | Prevalence (95% UI)                              |                                         |                                                                   |
|-----------------------------------------------|--------------------------------------------------|-----------------------------------------|-------------------------------------------------------------------|--------------------------------------------------|-----------------------------------------|-------------------------------------------------------------------|
|                                               | 2017 counts                                      | 2017 age-standardised rates per 100,000 | Percentage change in age-standardised rates between 1990 and 2017 | 2017 counts                                      | 2017 age-standardised rates per 100,000 | Percentage change in age-standardised rates between 1990 and 2017 |
| Panama                                        | 12 479<br>(11 093 to 13 984)                     | 315<br>(279 to 353)                     | 1.3<br>(-7.1 to 10.9)                                             | 34 821<br>(32 453 to 37 293)                     | 873<br>(814 to 935)                     | 2.5<br>(-2.8 to -0.4)                                             |
| Venezuela                                     | 126 599<br>(109 908 to 143 915)                  | 406<br>(354 to 460)                     | -3.2<br>(-12.2 to 7.1)                                            | 343 668<br>(321 169 to 368 190)                  | 1130<br>(1057 to 1210)                  | -5.6<br>(-7.3 to -4.0)                                            |
| <b>Tropical Latin America</b>                 | <b>1 092 019<br/>(946 059 to 1 248 763)</b>      | <b>475<br/>(413 to 542)</b>             | <b>50.5<br/>(42.1 to 58.5)</b>                                    | <b>3 344 953<br/>(3 033 427 to 3 671 892)</b>    | <b>1 393<br/>(1 264 to 1 526)</b>       | <b>50.2<br/>(42.9 to 57.8)</b>                                    |
| Brazil                                        | 1 063 263<br>(921 016 to 1 217 395)              | 477<br>(414 to 546)                     | 50.2<br>(41.7 to 58.1)                                            | 3 271 170<br>(2 965 346 to 3 591 705)            | 1 399<br>(1 268 to 1 533)               | 50.0<br>(42.5 to 57.6)                                            |
| Paraguay                                      | 28 756<br>(24 785 to 33 188)                     | 410<br>(356 to 468)                     | 70.3<br>(49.1 to 91.1)                                            | 73 782<br>(67 955 to 79 992)                     | 1 195<br>(1 101 to 1 294)               | 63.5<br>(60.3 to 67.2)                                            |
| <b>North Africa and Middle East</b>           | <b>3 647 741<br/>(3 169 298 to 4 151 722)</b>    | <b>603<br/>(528 to 681)</b>             | <b>-11.8<br/>(-16.3 to -7.5)</b>                                  | <b>9 314 458<br/>(8 670 467 to 10 054 284)</b>   | <b>1 746<br/>(1 623 to 1 883)</b>       | <b>-15.5<br/>(-16.4 to -14.5)</b>                                 |
| <b>North Africa and Middle East</b>           | <b>3 647 741<br/>(3 169 298 to 4 151 722)</b>    | <b>603<br/>(528 to 681)</b>             | <b>-11.8<br/>(-16.3 to -7.5)</b>                                  | <b>9 314 458<br/>(8 670 467 to 10 054 284)</b>   | <b>1 746<br/>(1 623 to 1 883)</b>       | <b>-15.5<br/>(-16.4 to -14.5)</b>                                 |
| Afghanistan                                   | 120 735<br>(101 019 to 144 842)                  | 410<br>(350 to 474)                     | -12.6<br>(-19.6 to -5.1)                                          | 243 780<br>(226 944 to 261 891)                  | 1 305<br>(1 214 to 1 403)               | -16.1<br>(-17.3 to -14.9)                                         |
| Algeria                                       | 266 520<br>(229 931 to 304 344)                  | 650<br>(563 to 736)                     | 23.1<br>(-28.3 to -17.3)                                          | 731 389<br>(679 604 to 787 831)                  | 1 907<br>(1 774 to 2 055)               | -25.9<br>(-26.9 to -24.9)                                         |
| Bahrain                                       | 8 512<br>(7 383 to 9 678)                        | 555<br>(490 to 622)                     | -31.9<br>(-38.8 to -25.2)                                         | 26 295<br>(24 448 to 28 394)                     | 1 629<br>(1 516 to 1 751)               | -33.1<br>(-34.8 to -31.5)                                         |
| Egypt                                         | 632 244<br>(545 004 to 721 060)                  | 675<br>(585 to 761)                     | -7.4<br>(-15.4 to -0.0)                                           | 1 527 082<br>(1 415 912 to 1 650 722)            | 1 967<br>(1 822 to 2 130)               | -12.5<br>(-14.0 to -11.0)                                         |
| Iran                                          | 578 111<br>(488 467 to 680 061)                  | 673<br>(575 to 782)                     | -23.5<br>(-27.0 to -19.9)                                         | 1 610 188<br>(1 496 935 to 1 742 511)            | 1 934<br>(1 799 to 2 087)               | -27.6<br>(-28.9 to -26.5)                                         |
| Iraq                                          | 144 667<br>(123 156 to 167 646)                  | 340<br>(293 to 385)                     | 40.4<br>(-45.2 to -34.5)                                          | 342 614<br>(320 955 to 365 974)                  | 1 052<br>(984 to 1 126)                 | -38.5<br>(-40.4 to -37.1)                                         |
| Jordan                                        | 45 306<br>(39 054 to 51 777)                     | 427<br>(372 to 482)                     | -30.4<br>(-38.0 to -23.3)                                         | 105 098<br>(98 289 to 112 582)                   | 1 230<br>(1 151 to 1 319)               | -32.9<br>(-34.3 to -31.8)                                         |
| Kuwait                                        | 32 117<br>(27 991 to 36 359)                     | 725<br>(642 to 810)                     | -27.6<br>(-35.1 to -18.9)                                         | 88 118<br>(82 196 to 95 164)                     | 2 105<br>(1 963 to 2 263)               | -28.1<br>(-29.2 to -27.0)                                         |
| Lebanon                                       | 48 469<br>(41 667 to 57 351)                     | 550<br>(474 to 643)                     | -11.7<br>(1.9 to 22.1)                                            | 119 686<br>(111 474 to 128 769)                  | 1 583<br>(1 474 to 1 703)               | 4.8<br>(7.1 to 10.7)                                              |
| Libya                                         | 55 945<br>(47 720 to 64 764)                     | 785<br>(678 to 894)                     | -14.2<br>(-20.8 to -6.7)                                          | 139 417<br>(128 767 to 151 549)                  | 2 238<br>(2 069 to 2 432)               | -17.6<br>(-18.7 to -16.5)                                         |
| Morocco                                       | 208 224<br>(178 746 to 237 422)                  | 572<br>(493 to 648)                     | -10.0<br>(-17.3 to -2.6)                                          | 594 570<br>(553 473 to 642 870)                  | 1 694<br>(1 577 to 1 831)               | -14.0<br>(-15.2 to -12.8)                                         |
| Palestine                                     | 15 154<br>(12 770 to 17 873)                     | 318<br>(272 to 367)                     | -10.2<br>(-17.2 to -2.5)                                          | 34 146<br>(31 879 to 36 544)                     | 958<br>(894 to 1 026)                   | -9.6<br>(-10.8 to -8.3)                                           |
| Oman                                          | 48 500<br>(48 500 to 65 770)                     | 550<br>(494 to 1 269)                   | 11.7<br>(35.1 to -23.3)                                           | 119 686<br>(116 140 to 137 359)                  | 1 583<br>(2 918 to 3 413)               | -31.2<br>(-32.4 to -30.0)                                         |
| Qatar                                         | 30 692<br>(26 304 to 35 541)                     | 966<br>(850 to 1 083)                   | -16.7<br>(-25.1 to -8.5)                                          | 71 734<br>(66 519 to 77 939)                     | 2 728<br>(2 535 to 2 946)               | -19.7<br>(-20.8 to -18.4)                                         |
| Saudi Arabia                                  | 400 922<br>(342 397 to 462 774)                  | 1 045<br>(912 to 1 183)                 | -11.3<br>(-21.3 to -1.1)                                          | 890 743<br>(818 669 to 979 730)                  | 2 920<br>(2 686 to 3 198)               | -15.6<br>(-17.1 to -14.1)                                         |
| Sudan                                         | 203 304<br>(172 244 to 236 657)                  | 553<br>(479 to 627)                     | -17.4<br>(-23.7 to -11.7)                                         | 454 834<br>(422 501 to 489 485)                  | 1 717<br>(1 594 to 1 852)               | -20.0<br>(-21.2 to -18.8)                                         |
| Syria                                         | 68 376<br>(58 019 to 79 057)                     | 389<br>(333 to 446)                     | -10.1<br>(-19.0 to -0.4)                                          | 172 789<br>(161 593 to 185 391)                  | 1 126<br>(1 054 to 1 208)               | -13.2<br>(-14.5 to -12.0)                                         |
| Tunisia                                       | 65 575<br>(56 466 to 75 506)                     | 553<br>(477 to 638)                     | 0.6<br>(7.2 to 9.1)                                               | 202 123<br>(187 136 to 218 662)                  | 1 608<br>(1 490 to 1 738)               | -3.8<br>(-5.3 to -2.1)                                            |
| Turkey                                        | 367 899<br>(321 637 to 416 795)                  | 443<br>(386 to 504)                     | 17.2<br>(8.3 to 26.5)                                             | 1 129 132<br>(1 050 999 to 1 213 776)            | 1 275<br>(1 188 to 1 369)               | 9.1<br>(7.1 to 10.9)                                              |
| United Arab Emirates                          | 123 480<br>(103 823 to 145 886)                  | 1 132<br>(1 002 to 1 275)               | -15.7<br>(-22.9 to -7.7)                                          | 327 381<br>(303 368 to 355 742)                  | 3 182<br>(2 956 to 3 443)               | -17.8<br>(-18.9 to -16.7)                                         |
| Yemen                                         | 171 330<br>(147 283 to 198 218)                  | 624<br>(546 to 709)                     | 21.1<br>(-26.5 to -14.6)                                          | 368 918<br>(344 033 to 396 299)                  | 1 890<br>(1 761 to 2 036)               | -23.6<br>(-24.9 to -22.5)                                         |
| <b>South Asia</b>                             | <b>8 457 957<br/>(7 169 469 to 10 031 040)</b>   | <b>462<br/>(393 to 545)</b>             | <b>49.0<br/>(42.3 to 55.6)</b>                                    | <b>23 048 088<br/>(21 253 672 to 25 062 773)</b> | <b>1 437<br/>(1 327 to 1 567)</b>       | <b>43.1<br/>(40.6 to 46.2)</b>                                    |
| <b>South Asia</b>                             | <b>8 457 957<br/>(7 169 469 to 10 031 040)</b>   | <b>462<br/>(393 to 545)</b>             | <b>49.0<br/>(42.3 to 55.6)</b>                                    | <b>23 048 088<br/>(21 253 672 to 25 062 773)</b> | <b>1 437<br/>(1 327 to 1 567)</b>       | <b>43.1<br/>(40.6 to 46.2)</b>                                    |
| Bangladesh                                    | 488 246<br>(416 666 to 570 648)                  | 298<br>(255 to 346)                     | 68.2<br>(54.9 to 85.0)                                            | 1 371 652<br>(1 264 805 to 1 487 123)            | 950<br>(878 to 1 032)                   | 60.3<br>(57.1 to 63.7)                                            |
| Bhutan                                        | 3 851<br>(3 235 to 4 536)                        | 367<br>(312 to 429)                     | 0.9<br>(-8.5 to 11.1)                                             | 10 086<br>(9 280 to 10 959)                      | 1 168<br>(1 077 to 1 267)               | -2.8<br>(-5.1 to -0.4)                                            |
| India                                         | 6 596 837<br>(5 538 899 to 7 879 123)            | 463<br>(390 to 549)                     | 45.0<br>(37.4 to 53.2)                                            | 18 375 144<br>(16 927 415 to 20 047 566)         | 1 445<br>(1 332 to 1 577)               | 40.3<br>(37.6 to 43.3)                                            |
| Nepal                                         | 132 834<br>(113 152 to 156 543)                  | 437<br>(375 to 508)                     | 36.0<br>(27.7 to 45.0)                                            | 353 306<br>(325 678 to 383 730)                  | 1 382<br>(1 276 to 1 504)               | 32.0<br>(29.5 to 34.8)                                            |
| Pakistan                                      | 1 236 189<br>(1 057 252 to 1 460 214)            | 568<br>(490 to 637)                     | 61.3<br>(50.0 to 73.3)                                            | 2 937 900<br>(2 695 517 to 3 198 542)            | 1 815<br>(1 670 to 1 981)               | 55.5<br>(55.5 to 62.0)                                            |
| <b>Southeast Asia, East Asia, and Oceania</b> | <b>20 809 598<br/>(18 003 124 to 23 852 398)</b> | <b>882<br/>(772 to 999)</b>             | <b>92.9<br/>(85.1 to 100.8)</b>                                   | <b>69 014 270<br/>(63 694 029 to 74 704 932)</b> | <b>2 627<br/>(2 431 to 2 840)</b>       | <b>81.3<br/>(77.7 to 85.1)</b>                                    |
| <b>East Asia</b>                              | <b>15 572 911<br/>(13 389 614 to 17 938 779)</b> | <b>939<br/>(811 to 1 072)</b>           | <b>111.2<br/>(101.4 to 120.8)</b>                                 | <b>53 552 607<br/>(49 383 606 to 58 086 220)</b> | <b>2 741<br/>(2 531 to 2 972)</b>       | <b>94.9<br/>(90.7 to 99.4)</b>                                    |
| China                                         | 14 840 576<br>(12 727 729 to 17 118 937)         | 940<br>(810 to 1 075)                   | 113.9<br>(103.7 to 123.6)                                         | 50 992 074<br>(47 007 604 to 55 308 501)         | 2 744<br>(2 534 to 2 975)               | 97.0<br>(92.6 to 101.8)                                           |
| North Korea                                   | 229 875<br>(198 667 to 265 267)                  | 824<br>(717 to 950)                     | 110.0<br>(95.2 to 126.4)                                          | 765 861<br>(709 715 to 830 351)                  | 2 462<br>(2 285 to 2 663)               | 107.4<br>(103.7 to 111.4)                                         |
| Taiwan (Province of China)                    | 251 589<br>(222 814 to 280 305)                  | 990<br>(876 to 1 115)                   | 23.0<br>(10.4 to 37.8)                                            | 931 969<br>(862 516 to 1 007 055)                | 2 820<br>(2 614 to 3 042)               | 19.0<br>(14.4 to 23.7)                                            |
| <b>Oceania</b>                                | <b>90 566<br/>(77 855 to 104 811)</b>            | <b>744<br/>(647 to 853)</b>             | <b>68.2<br/>(56.5 to 81.5)</b>                                    | <b>213 271<br/>(198 008 to 231 651)</b>          | <b>2 271<br/>(2 110 to 2 472)</b>       | <b>66.5<br/>(64.2 to 69.1)</b>                                    |
| American Samoa                                | 344<br>(298 to 393)                              | 632<br>(547 to 727)                     | 59.6<br>(46.0 to 74.2)                                            | 945<br>(877 to 1 018)                            | 1 887<br>(1 755 to 2 035)               | 56.0<br>(53.6 to 58.9)                                            |
| Federated States of Micronesia                | 730<br>(623 to 848)                              | 708<br>(606 to 824)                     | 83.6<br>(69.1 to 99.8)                                            | 1 919<br>(1 777 to 2 090)                        | 2 172<br>(2 007 to 2 356)               | 78.7<br>(75.5 to 81.9)                                            |
| Fiji                                          | 5 541<br>(4 815 to 6 347)                        | 602<br>(525 to 688)                     | 83.8<br>(64.7 to 103.3)                                           | 15 887<br>(14 786 to 17 120)                     | 1 836<br>(1 709 to 1 979)               | 81.0<br>(77.8 to 84.9)                                            |
| Guam                                          | 1 569<br>(1 370 to 1 782)                        | 933<br>(816 to 1 063)                   | 66.6<br>(51.7 to 81.6)                                            | 4 826<br>(4 470 to 5 219)                        | 2 700<br>(2 502 to 2 913)               | 65.5<br>(61.7 to 69.7)                                            |
| Kiribati                                      | 543<br>(458 to 635)                              | 465<br>(397 to 539)                     | 103.5<br>(86.3 to 123.1)                                          | 1 377<br>(1 280 to 1 488)                        | 1 471<br>(1 366 to 1 591)               | 101.2<br>(96.6 to 107.4)                                          |
| Marshall Islands                              | 425<br>(364 to 491)                              | 755<br>(650 to 866)                     | 93.3<br>(77.2 to 112.2)                                           | 1 046<br>(971 to 1 137)                          | 2 299<br>(2 132 to 2 497)               | 89.9<br>(86.6 to 93.9)                                            |
| Northern Mariana Islands                      | 359<br>(314 to 409)                              | 773<br>(674 to 881)                     | 26.0<br>(15.9 to 37.0)                                            | 1 206<br>(1 120 to 1 306)                        | 2 222<br>(2 071 to 2 397)               | 23.4<br>(21.5 to 25.6)                                            |
| Papua New Guinea                              | 68 220<br>(58 294 to 79 140)                     | 769<br>(665 to 883)                     | 60.9<br>(48.2 to 75.8)                                            | 154 930<br>(143 456 to 168 865)                  | 2 368<br>(2 192 to 2 586)               | 59.6<br>(57.1 to 62.1)                                            |
| Samoa                                         | 1 244<br>(1 069 to 1 454)                        | 677<br>(585 to 784)                     | 85.8<br>(70.9 to 103.7)                                           | 3 277<br>(3 044 to 3 534)                        | 2 072<br>(1 923 to 2 235)               | 81.9<br>(79.1 to 85.2)                                            |
| Solomon Islands                               | 2 966<br>(3 381 to 4 637)                        | 662<br>(571 to 766)                     | 78.2<br>(64.6 to 92.0)                                            | 9 450<br>(8 773 to 10 244)                       | 2 081<br>(1 934 to 2 257)               | 75.7<br>(72.9 to 79.6)                                            |
| Tonga                                         | 583<br>(505 to 665)                              | 585<br>(508 to 664)                     | 86.6<br>(71.9 to 104.2)                                           | 1 571<br>(1 463 to 1 694)                        | 1 772<br>(1 652 to 1 910)               | 81.0<br>(78.1 to 84.9)                                            |
| Vanuatu                                       | 2 052<br>(1 747 to 2 396)                        | 762<br>(652 to 879)                     | 88.9<br>(76.8 to 102.6)                                           | 5 082<br>(4 729 to 5 492)                        | 2 394<br>(2 220 to 2 596)               | 86.9<br>(84.4 to 89.8)                                            |
| <b>Southeast Asia</b>                         | <b>5 146 121<br/>(4 493 905 to 5 855 603)</b>    | <b>748<br/>(657 to 851)</b>             | <b>50.6<br/>(42.9 to 58.5)</b>                                    | <b>15 248 393<br/>(14 122 438 to 16 448 412)</b> | <b>2 289<br/>(2 128 to 2 466)</b>       | <b>44.7<br/>(41.7 to 47.7)</b>                                    |
| Cambodia                                      | 115 215<br>(99 543 to 134 834)                   | 715<br>(620 to 825)                     | 53.4<br>(51.5 to 76.5)                                            | 2 145<br>(2 76 989 to 320 552)                   | 2 145<br>(1 997 to 2 311)               | 53.8<br>(52.4 to 59.4)                                            |
| Indonesia                                     | 1 882 125<br>(1 592 917 to 2 213 048)            | 703<br>(600 to 822)                     | 38.7<br>(30.4 to 47.5)                                            | 5 621 101<br>(5 189 045 to 6 077 804)            | 2 200<br>(2 033 to 2 375)               | 32.3<br>(28.3 to 36.7)                                            |

| Location                           | Incidence (95% UI)                            |                                         |                                                                   | Prevalence (95% UI)                              |                                         |                                                                   |
|------------------------------------|-----------------------------------------------|-----------------------------------------|-------------------------------------------------------------------|--------------------------------------------------|-----------------------------------------|-------------------------------------------------------------------|
|                                    | 2017 counts                                   | 2017 age-standardised rates per 100,000 | Percentage change in age-standardised rates between 1990 and 2017 | 2017 counts                                      | 2017 age-standardised rates per 100,000 | Percentage change in age-standardised rates between 1990 and 2017 |
| Laos                               | 55 544<br>(47 543 to 63 808)                  | 788<br>(680 to 893)                     | 50.4<br>(39.3 to 63.8)                                            | 139 068<br>(129 223 to 149 092)                  | 2 449<br>(2 276 to 2 628)               | 2 449<br>(42.0 to 48.2)                                           |
| Malaysia                           | 367 736<br>(321 285 to 416 265)               | 1 134<br>(996 to 1 273)                 | 68.5<br>(51.8 to 85.9)                                            | 967 238<br>(896 405 to 1 040 041)                | 3 254<br>(3 012 to 3 504)               | 59.2<br>(56.6 to 61.8)                                            |
| Maldives                           | 3 472<br>(2 894 to 4 173)                     | 670<br>(572 to 786)                     | 42.1<br>(31.7 to 52.8)                                            | 8 382<br>(7 804 to 9 042)                        | 1 946<br>(1 812 to 2 097)               | 30.5<br>(27.8 to 33.8)                                            |
| Mauritius                          | 9 898<br>(8 636 to 11 206)                    | 743<br>(646 to 857)                     | 86.8<br>(70.4 to 103.2)                                           | 34 165<br>(31 704 to 36 865)                     | 2 159<br>(2 005 to 2 327)               | 84.7<br>(80.1 to 89.7)                                            |
| Myanmar                            | 355 327<br>(307 093 to 402 527)               | 645<br>(559 to 728)                     | 52.3<br>(39.7 to 65.8)                                            | 1 006 447<br>(935 340 to 1 080 868)              | 1 960<br>(1 823 to 2 102)               | 44.7<br>(41.3 to 48.1)                                            |
| Philippines                        | 530 282<br>(461 890 to 606 945)               | 513<br>(449 to 582)                     | 98.2<br>(79.6 to 120.1)                                           | 1 361 830<br>(1 268 947 to 1 460 207)            | 1 527<br>(1 422 to 1 641)               | 90.7<br>(87.2 to 95.2)                                            |
| Sri Lanka                          | 149 394<br>(131 503 to 169 925)               | 669<br>(587 to 769)                     | 129.3<br>(107.9 to 154.5)                                         | 463 477<br>(430 905 to 498 611)                  | 1 913<br>(1 782 to 2 055)               | 121.0<br>(116.9 to 126.3)                                         |
| Seychelles                         | 824<br>(724 to 928)                           | 774<br>(682 to 868)                     | 104.2<br>(86.3 to 120.1)                                          | 2 536<br>(2 355 to 2 735)                        | 2 228<br>(2 073 to 2 399)               | 95.4<br>(91.9 to 99.0)                                            |
| Thailand                           | 816 798<br>(721 207 to 915 096)               | 1 084<br>(956 to 1 212)                 | 1084<br>(23.0 to 51.6)                                            | 2 886 211<br>(2 657 406 to 3 128 610)            | 3 122<br>(2 876 to 3 381)               | 29.0<br>(26.4 to 32.1)                                            |
| Timor-Leste                        | 6 849<br>(5 778 to 8 067)                     | 566<br>(481 to 662)                     | 92.6<br>(79.2 to 106.9)                                           | 16 622<br>(15 476 to 17 780)                     | 1 759<br>(1 638 to 1 886)               | 84.0<br>(80.9 to 87.9)                                            |
| Vietnam                            | 844 886<br>(737 516 to 962 944)               | 821<br>(718 to 932)                     | 72.7<br>(56.9 to 89.7)                                            | 2 423 058<br>(2 246 430 to 2 608 362)            | 2 376<br>(2 204 to 2 554)               | 62.3<br>(59.7 to 65.6)                                            |
| <b>Sub-Saharan Africa</b>          | <b>5 090 795<br/>(4 385 621 to 5 908 108)</b> | <b>563<br/>(493 to 638)</b>             | <b>-16.8<br/>(-20.3 to -13.6)</b>                                 | <b>11 177 501<br/>(10 428 363 to 12 021 346)</b> | <b>1 703<br/>(1 582 to 1 824)</b>       | <b>-18.6<br/>(-19.8 to -17.7)</b>                                 |
| <b>Central sub-Saharan Africa</b>  | <b>856 081<br/>(738 450 to 985 218)</b>       | <b>751<br/>(660 to 849)</b>             | <b>-16.7<br/>(-21.9 to -11.5)</b>                                 | <b>1 873 278<br/>(1 737 190 to 2 023 688)</b>    | <b>2 334<br/>(2 166 to 2 534)</b>       | <b>-18.4<br/>(-19.7 to -17.3)</b>                                 |
| Angola                             | 227 429<br>(196 264 to 260 998)               | 887<br>(775 to 996)                     | -20.7<br>(-26.0 to -14.5)                                         | 475 233<br>(439 997 to 515 624)                  | 2 734<br>(2 535 to 2 973)               | -23.7<br>(-25.5 to -22.2)                                         |
| Central African Republic           | 33 517<br>(28 489 to 39 491)                  | 738<br>(634 to 854)                     | -13.6<br>(-19.6 to -6.4)                                          | 78 179<br>(71 888 to 86 166)                     | 2 352<br>(2 180 to 2 587)               | -12.5<br>(-13.5 to -11.5)                                         |
| Congo (Brazzaville)                | 40 694<br>(35 363 to 46 934)                  | 845<br>(742 to 962)                     | -19.7<br>(-25.6 to -13.8)                                         | 98 194<br>(91 108 to 106 533)                    | 2 620<br>(2 431 to 2 845)               | -19.8<br>(-21.1 to -18.5)                                         |
| DR Congo                           | 526 541<br>(450 018 to 611 636)               | 693<br>(605 to 786)                     | -16.0<br>(-22.5 to -10.0)                                         | 1 158 233<br>(1 074 163 to 1 251 269)            | 2 161<br>(2 004 to 2 343)               | -17.4<br>(-18.7 to -16.2)                                         |
| Equatorial Guinea                  | 10 954<br>(9 381 to 12 812)                   | 867<br>(756 to 989)                     | -4.9<br>(-11.9 to 2.6)                                            | 20 760<br>(19 263 to 22 427)                     | 2 523<br>(2 337 to 2 738)               | -13.7<br>(-16.1 to -11.6)                                         |
| Gabon                              | 16 947<br>(14 727 to 19 342)                  | 1 007<br>(880 to 1 141)                 | -22.4<br>(-27.4 to -16.9)                                         | 42 679<br>(39 609 to 46 196)                     | 3 092<br>(2 872 to 3 345)               | -22.4<br>(-23.5 to -21.4)                                         |
| <b>Eastern sub-Saharan Africa</b>  | <b>1 886 499<br/>(1 620 923 to 2 208 244)</b> | <b>567<br/>(497 to 642)</b>             | <b>-17.8<br/>(-21.4 to -14.5)</b>                                 | <b>4 020 143<br/>(3 736 311 to 4 323 682)</b>    | <b>1 701<br/>(1 583 to 1 838)</b>       | <b>-19.3<br/>(-20.4 to -18.4)</b>                                 |
| Burundi                            | 63 310<br>(54 770 to 72 428)                  | 691<br>(606 to 781)                     | -28.0<br>(-32.5 to -22.6)                                         | 134 988<br>(125 354 to 145 823)                  | 2 098<br>(1 948 to 2 280)               | -27.4<br>(-28.6 to -26.3)                                         |
| Comoros                            | 4 699<br>(4 095 to 5 336)                     | 697<br>(609 to 784)                     | -28.1<br>(-33.0 to -23.2)                                         | 11 822<br>(10 993 to 12 791)                     | 2 099<br>(1 952 to 2 272)               | -30.2<br>(-31.5 to -29.2)                                         |
| Djibouti                           | 8 028<br>(6 899 to 9 160)                     | 777<br>(678 to 879)                     | -16.6<br>(-22.0 to -11.0)                                         | 19 361<br>(17 968 to 20 922)                     | 2 328<br>(2 166 to 2 523)               | -17.8<br>(-18.9 to -16.7)                                         |
| Eritrea                            | 34 840<br>(29 933 to 40 052)                  | 670<br>(586 to 760)                     | -17.8<br>(-22.8 to -11.2)                                         | 72 707<br>(67 380 to 78 742)                     | 1 963<br>(1 816 to 2 134)               | -18.9<br>(-20.1 to -17.7)                                         |
| Ethiopia                           | 339 143<br>(280 396 to 413 509)               | 390<br>(331 to 458)                     | -38.7<br>(-42.0 to -35.7)                                         | 727 670<br>(676 923 to 782 426)                  | 1 204<br>(1 119 to 1 297)               | -39.4<br>(-40.9 to -38.1)                                         |
| Kenya                              | 298 792<br>(252 730 to 354 710)               | 711<br>(614 to 819)                     | 1.8<br>(-2.6 to 6.2)                                              | 655 045<br>(604 853 to 708 350)                  | 2 104<br>(1 944 to 2 281)               | 0.0<br>(-0.8 to 0.8)                                              |
| Madagascar                         | 145 408<br>(125 223 to 167 745)               | 657<br>(574 to 737)                     | -23.6<br>(-29.1 to -17.8)                                         | 313 009<br>(291 101 to 338 099)                  | 1 975<br>(1 835 to 2 144)               | -26.1<br>(-27.7 to -24.9)                                         |
| Malawi                             | 64 910<br>(55 340 to 75 495)                  | 435<br>(379 to 490)                     | -21.8<br>(-27.6 to -15.5)                                         | 138 709<br>(129 065 to 148 847)                  | 1 292<br>(1 205 to 1 448)               | -23.7<br>(-25.2 to -22.6)                                         |
| Mozambique                         | 153 527<br>(131 995 to 177 226)               | 619<br>(542 to 698)                     | 2.5<br>(-6.0 to 11.3)                                             | 307 480<br>(286 096 to 333 054)                  | 1 822<br>(1 692 to 1 981)               | -3.4<br>(-4.7 to -2.1)                                            |
| Rwanda                             | 78 549<br>(68 285 to 91 071)                  | 718<br>(632 to 814)                     | -32.0<br>(-36.6 to -26.9)                                         | 173 639<br>(161 246 to 187 387)                  | 2 119<br>(1 968 to 2 289)               | -33.5<br>(-35.0 to -32.3)                                         |
| Somalia                            | 103 607<br>(87 747 to 122 270)                | 731<br>(630 to 837)                     | -9.7<br>(-15.3 to -3.1)                                           | 220 858<br>(203 693 to 241 505)                  | 2 246<br>(2 070 to 2 462)               | -9.8<br>(-10.6 to -8.9)                                           |
| South Sudan                        | 61 813<br>(53 075 to 71 879)                  | 744<br>(654 to 845)                     | -0.1<br>(-6.1 to 6.2)                                             | 131 650<br>(121 512 to 143 175)                  | 2 276<br>(2 106 to 2 483)               | 0.9<br>(-0.1 to 1.8)                                              |
| Tanzania                           | 239 805<br>(206 054 to 278 628)               | 516<br>(453 to 581)                     | -12.2<br>(-18.8 to -5.4)                                          | 527 488<br>(491 490 to 565 814)                  | 1 549<br>(1 448 to 1 661)               | -13.1<br>(-14.2 to -12.2)                                         |
| Uganda                             | 203 889<br>(175 213 to 236 519)               | 640<br>(563 to 721)                     | 2.0<br>(-4.2 to 8.6)                                              | 406 134<br>(376 766 to 436 297)                  | 1 903<br>(1 774 to 2 048)               | 2.5<br>(1.1 to 3.7)                                               |
| Zambia                             | 84 994<br>(73 106 to 98 497)                  | 771<br>(677 to 868)                     | -24.6<br>(-30.0 to -19.6)                                         | 177 600<br>(164 618 to 190 481)                  | 1 720<br>(1 604 to 1 854)               | -25.0<br>(-26.6 to -24.3)                                         |
| <b>Southern sub-Saharan Africa</b> | <b>590 513<br/>(502 359 to 689 187)</b>       | <b>768<br/>(659 to 888)</b>             | <b>-25.1<br/>(-27.9 to -21.8)</b>                                 | <b>1 515 647<br/>(1 399 072 to 1 650 498)</b>    | <b>2 264<br/>(2 091 to 2 468)</b>       | <b>-29.3<br/>(-31.2 to -27.5)</b>                                 |
| Botswana                           | 14 551<br>(12 662 to 16 605)                  | 650<br>(570 to 737)                     | 8.1<br>(1.1 to 15.4)                                              | 36 839<br>(34 022 to 40 036)                     | 1 927<br>(1 780 to 2 096)               | 6.4<br>(4.9 to 8.0)                                               |
| Lesotho                            | 15 658<br>(13 560 to 18 023)                  | 810<br>(708 to 923)                     | 30.5<br>(19.5 to 42.1)                                            | 37 615<br>(34 666 to 41 058)                     | 2 390<br>(2 206 to 2 614)               | 26.1<br>(24.2 to 28.2)                                            |
| Namibia                            | 17 469<br>(15 134 to 20 194)                  | 758<br>(662 to 863)                     | -11.1<br>(-17.7 to -3.8)                                          | 41 635<br>(38 458 to 45 396)                     | 2 240<br>(2 072 to 2 445)               | -14.1<br>(-15.3 to -12.8)                                         |
| South Africa                       | 456 862<br>(384 538 to 535 410)               | 811<br>(687 to 946)                     | -32.5<br>(-35.7 to -28.9)                                         | 1 209 288<br>(1 112 684 to 1 319 123)            | 2 363<br>(2 176 to 2 582)               | -36.4<br>(-38.4 to -34.5)                                         |
| Swaziland                          | 9 465<br>(8 130 to 11 009)                    | 864<br>(750 to 986)                     | 6.6<br>(-1.1 to 14.5)                                             | 20 916<br>(19 275 to 22 850)                     | 2 535<br>(2 336 to 2 779)               | 2.4<br>(1.0 to 4.0)                                               |
| Zimbabwe                           | 76 508<br>(65 357 to 89 540)                  | 576<br>(500 to 662)                     | 14.9<br>(6.9 to 23.9)                                             | 169 354<br>(157 377 to 182 613)                  | 1 714<br>(1 589 to 1 855)               | 17.6<br>(15.9 to 19.5)                                            |
| <b>Western sub-Saharan Africa</b>  | <b>1 757 612<br/>(1 498 547 to 2 054 475)</b> | <b>458<br/>(400 to 519)</b>             | <b>-9.9<br/>(-12.7 to -3.1)</b>                                   | <b>3 768 432<br/>(3 517 353 to 4 025 686)</b>    | <b>1 371<br/>(1 285 to 1 467)</b>       | <b>-11.0<br/>(-11.9 to -10.1)</b>                                 |
| Benin                              | 67 150<br>(57 257 to 79 132)                  | 658<br>(572 to 750)                     | -11.6<br>(-17.0 to -6.3)                                          | 144 255<br>(134 385 to 154 874)                  | 2 010<br>(1 874 to 2 157)               | -14.4<br>(-15.9 to -13.1)                                         |
| Burkina Faso                       | 53 686<br>(44 262 to 66 002)                  | 261<br>(222 to 306)                     | 38.4<br>(27.5 to 50.9)                                            | 117 504<br>(109 112 to 125 900)                  | 841<br>(785 to 898)                     | 35.3<br>(33.3 to 37.4)                                            |
| Cameroon                           | 114 580<br>(98 517 to 132 814)                | 467<br>(411 to 525)                     | -24.8<br>(-30.4 to -19.2)                                         | 246 554<br>(229 864 to 263 621)                  | 1 400<br>(1 305 to 1 503)               | -26.5<br>(-27.5 to -25.6)                                         |
| Cape Verde                         | 2 393<br>(2 085 to 2 768)                     | 438<br>(385 to 503)                     | 31.8<br>(23.5 to 40.3)                                            | 6 340<br>(5 940 to 6 759)                        | 1 275<br>(1 194 to 1 361)               | 25.8<br>(24.0 to 27.4)                                            |
| Chad                               | 57 988<br>(48 621 to 67 513)                  | 446<br>(391 to 504)                     | 8.0<br>(1.0 to 15.9)                                              | 117 762<br>(109 923 to 125 837)                  | 1 387<br>(1 294 to 1 483)               | 7.5<br>(6.5 to 8.9)                                               |
| Cote d'Ivoire                      | 106 983<br>(91 902 to 124 287)                | 473<br>(414 to 536)                     | -13.1<br>(-18.9 to -7.0)                                          | 240 537<br>(224 993 to 256 907)                  | 1 451<br>(1 355 to 1 552)               | -14.1<br>(-14.9 to -13.2)                                         |
| The Gambia                         | 8 862<br>(7 589 to 10 423)                    | 464<br>(406 to 529)                     | -8.1<br>(-13.7 to -2.4)                                           | 19 272<br>(17 996 to 20 614)                     | 1 396<br>(1 304 to 1 497)               | -11.2<br>(-12.1 to -10.3)                                         |
| Ghana                              | 162 014<br>(141 204 to 187 500)               | 582<br>(510 to 661)                     | -22.3<br>(-29.3 to -15.1)                                         | 370 754<br>(345 920 to 397 129)                  | 1 702<br>(1 588 to 1 825)               | 16.6<br>(15.4 to 17.9)                                            |
| Guinea                             | 48 438<br>(41 744 to 56 133)                  | 467<br>(411 to 525)                     | -11.7<br>(-17.9 to -5.0)                                          | 108 046<br>(101 078 to 115 441)                  | 1 440<br>(1 345 to 1 542)               | -14.5<br>(-16.3 to -12.9)                                         |
| Guinea-Bissau                      | 7 435<br>(6 375 to 8 643)                     | 450<br>(396 to 510)                     | -24.1<br>(-29.0 to -19.0)                                         | 15 813<br>(14 726 to 16 919)                     | 1 375<br>(1 281 to 1 472)               | -26.0<br>(-27.2 to -24.8)                                         |
| Liberia                            | 14 598<br>(12 341 to 17 145)                  | 343<br>(298 to 389)                     | -23.8<br>(-29.3 to -18.1)                                         | 32 633<br>(30 423 to 34 931)                     | 1 053<br>(982 to 1 126)                 | -26.7<br>(-27.9 to -25.5)                                         |
| Mali                               | 77 152<br>(65 109 to 90 060)                  | 431<br>(374 to 490)                     | -22.6<br>(-27.2 to -18.0)                                         | 161 714<br>(150 438 to 172 933)                  | 1 325<br>(1 233 to 1 416)               | -25.0<br>(-26.2 to -23.8)                                         |
| Mauritania                         | 13 807<br>(11 870 to 16 273)                  | 385<br>(336 to 440)                     | -26.1<br>(-30.8 to -21.1)                                         | 31 461<br>(29 411 to 33 652)                     | 1 166<br>(1 092 to 1 251)               | -27.3<br>(-28.3 to -26.5)                                         |

| Location              | Incidence (95% UI)              |                                         |                                                                   | Prevalence (95% UI)                   |                                         |                                                                   |
|-----------------------|---------------------------------|-----------------------------------------|-------------------------------------------------------------------|---------------------------------------|-----------------------------------------|-------------------------------------------------------------------|
|                       | 2017 counts                     | 2017 age-standardised rates per 100,000 | Percentage change in age-standardised rates between 1990 and 2017 | 2017 counts                           | 2017 age-standardised rates per 100,000 | Percentage change in age-standardised rates between 1990 and 2017 |
| Niger                 | 72 137<br>(60 106 to 85 255)    | 405<br>(352 to 462)                     | -19.5<br>(-24.6 to -13.6)                                         | 143 522<br>(134 190 to 153 819)       | 1243<br>(1 163 to 1 332)                | -23.1<br>(-24.4 to -21.8)                                         |
| Nigeria               | 830 941<br>(702 111 to 977 830) | 457<br>(398 to 523)                     | -7.1<br>(-13.0 to -1.3)                                           | 1 741 697<br>(1 622 897 to 1 862 143) | 1 347<br>(1 263 to 1 441)               | -11.0<br>(-11.9 to -10.0)                                         |
| Sao Tome and Principe | 906<br>(781 to 1 060)           | 487<br>(426 to 556)                     | 4.9<br>(-3.0 to 12.8)                                             | 2 113<br>(1 973 to 2 260)             | 1 458<br>(1 360 to 1 560)               | -0.5<br>(-2.1 to 1.2)                                             |
| Senegal               | 56 480<br>(48 779 to 65 999)    | 428<br>(375 to 484)                     | -16.1<br>(-22.0 to -10.2)                                         | 129 375<br>(120 848 to 138 165)       | 1 301<br>(1 217 to 1 393)               | -18.9<br>(-20.2 to -17.8)                                         |
| Sierra Leone          | 30 804<br>(26 702 to 35 625)    | 441<br>(387 to 496)                     | -15.8<br>(-20.9 to -9.9)                                          | 68 075<br>(63 508 to 72 926)          | 1 339<br>(1 248 to 1 436)               | -19.0<br>(-20.4 to -17.7)                                         |
| Togo                  | 31 240<br>(26 760 to 36 278)    | 461<br>(403 to 523)                     | -12.9<br>(-18.7 to -6.8)                                          | 70 988<br>(66 283 to 75 914)          | 1 381<br>(1 290 to 1 478)               | -16.3<br>(-17.8 to -15.1)                                         |
