# Supplementary material for: Morbidity and mortality from road injuries: results from the Global Burden of Disease Study 2017
Source: HighWire-hosted journal article supplement (doi:10.1136/injuryprev-2019-043302), 2020-01-08
Supplement: injuryprev-2019-043302supp004_data_supplement.pdf [file injuryprev-2019-043302supp004_data_supplement.pdf]

| Table 2: Mortality for 2017 and percentage change of age-standardised rates between 1990 and 2017 by location for road injuries |                                              |                                         |                                                                   |
|---------------------------------------------------------------------------------------------------------------------------------|----------------------------------------------|-----------------------------------------|-------------------------------------------------------------------|
| Location                                                                                                                        | Mortality (95% UI)                           |                                         |                                                                   |
|                                                                                                                                 | 2017 counts                                  | 2017 age-standardised rates per 100,000 | Percentage change in age-standardised rates between 1990 and 2017 |
| <b>Global</b>                                                                                                                   | <b>1 243 068</b><br>(1 191 889 to 1 276 940) | <b>15.8</b><br>(15.2 to 16.3)           | <b>-29.0</b><br>(-33.6 to -25.0)                                  |
| <b>Low SDI</b>                                                                                                                  | <b>210 016</b><br>(197 673 to 222 927)       | <b>20.6</b><br>(19.4 to 21.8)           | <b>-19.0</b><br>(-27.2 to -4.8)                                   |
| <b>Low-middle SDI</b>                                                                                                           | <b>313 285</b><br>(289 059 to 331 347)       | <b>20.6</b><br>(18.9 to 21.8)           | <b>-21.1</b><br>(-29.0 to -14.2)                                  |
| <b>Middle SDI</b>                                                                                                               | <b>376 334</b><br>(357 728 to 389 646)       | <b>17.0</b><br>(16.2 to 17.6)           | <b>-27.4</b><br>(-33.7 to -22.7)                                  |
| <b>High-middle SDI</b>                                                                                                          | <b>234 727</b><br>(223 744 to 243 437)       | <b>15.0</b><br>(14.3 to 15.5)           | <b>-34.6</b><br>(-39.8 to -30.5)                                  |
| <b>High SDI</b>                                                                                                                 | <b>103 359</b><br>(101 354 to 105 976)       | <b>7.5</b><br>(7.3 to 7.7)              | <b>-56.0</b><br>(-57.1 to -54.8)                                  |
| <b>Central Europe, Eastern Europe, and Central Asia</b>                                                                         | <b>54 869</b><br>(53 678 to 56 296)          | <b>11.9</b><br>(11.6 to 12.2)           | <b>-45.7</b><br>(-47.0 to -43.9)                                  |
| <b>Central Asia</b>                                                                                                             | <b>10 767</b><br>(10 146 to 11 452)          | <b>11.8</b><br>(11.2 to 12.5)           | <b>-39.7</b><br>(-43.2 to -35.8)                                  |
| Armenia                                                                                                                         | 242<br>(229 to 258)                          | 7.0<br>(6.6 to 7.5)                     | -58.9<br>(-61.7 to -55.4)                                         |
| Azerbaijan                                                                                                                      | 645<br>(562 to 729)                          | 6.2<br>(5.4 to 6.9)                     | -61.4<br>(-67.0 to -56.1)                                         |
| Georgia                                                                                                                         | 724<br>(667 to 773)                          | 17.4<br>(16.1 to 18.6)                  | -14.0<br>(-21.0 to -6.9)                                          |
| Kazakhstan                                                                                                                      | 2 767<br>(2 555 to 2 999)                    | 14.9<br>(13.8 to 16.1)                  | -35.8<br>(-40.4 to -30.1)                                         |
| Kyrgyzstan                                                                                                                      | 884<br>(827 to 953)                          | 14.6<br>(13.7 to 15.8)                  | -44.9<br>(-49.3 to -39.9)                                         |
| Mongolia                                                                                                                        | 546<br>(480 to 626)                          | 16.4<br>(14.5 to 18.7)                  | 10.8<br>(-9.2 to 35.7)                                            |
| Tajikistan                                                                                                                      | 645<br>(577 to 724)                          | 7.6<br>(6.8 to 8.5)                     | -46.8<br>(-53.4 to -39.3)                                         |
| Turkmenistan                                                                                                                    | 323<br>(289 to 365)                          | 6.4<br>(5.8 to 7.3)                     | -65.8<br>(-69.9 to -61.4)                                         |
| Uzbekistan                                                                                                                      | 3 990<br>(3 483 to 4 535)                    | 12.8<br>(11.2 to 14.5)                  | -30.0<br>(-39.0 to -20.2)                                         |
| <b>Central Europe</b>                                                                                                           | <b>10 977</b><br>(10 629 to 11 375)          | <b>8.0</b><br>(7.7 to 8.2)              | <b>-56.8</b><br>(-58.3 to -55.0)                                  |
| Albania                                                                                                                         | 248<br>(201 to 304)                          | 7.9<br>(6.4 to 9.7)                     | -39.5<br>(-51.3 to -24.9)                                         |
| Bosnia and Herzegovina                                                                                                          | 269<br>(244 to 293)                          | 6.4<br>(5.8 to 7.0)                     | 4.9<br>(-11.3 to 19.5)                                            |
| Bulgaria                                                                                                                        | 719<br>(665 to 782)                          | 8.7<br>(8.0 to 9.5)                     | -41.3<br>(-46.1 to -36.0)                                         |
| Croatia                                                                                                                         | 379<br>(353 to 408)                          | 7.3<br>(6.8 to 7.9)                     | -61.0<br>(-63.9 to -57.7)                                         |
| Czech Republic                                                                                                                  | 853<br>(794 to 918)                          | 6.6<br>(6.1 to 7.1)                     | -53.1<br>(-56.8 to -49.1)                                         |
| Hungary                                                                                                                         | 789<br>(734 to 864)                          | 6.3<br>(5.9 to 6.9)                     | -69.1<br>(-71.4 to -65.9)                                         |
| Macedonia                                                                                                                       | 161<br>(145 to 175)                          | 6.5<br>(5.8 to 7.1)                     | -29.3<br>(-38.4 to -21.4)                                         |
| Montenegro                                                                                                                      | 57<br>(51 to 63)                             | 7.7<br>(7.0 to 8.6)                     | -29.0<br>(-38.3 to -18.8)                                         |
| Poland                                                                                                                          | 3 954<br>(3 704 to 4 234)                    | 8.7<br>(8.1 to 9.3)                     | -60.9<br>(-63.6 to -57.8)                                         |
| Romania                                                                                                                         | 2 184<br>(2 044 to 2 330)                    | 9.4<br>(8.8 to 10.0)                    | -51.9<br>(-55.0 to -48.6)                                         |
| Serbia                                                                                                                          | 780<br>(721 to 839)                          | 7.1<br>(6.5 to 7.6)                     | -52.3<br>(-57.4 to -45.5)                                         |
| Slovakia                                                                                                                        | 442<br>(407 to 493)                          | 7.0<br>(6.4 to 7.8)                     | -65.3<br>(-68.6 to -61.2)                                         |
| Slovenia                                                                                                                        | 142<br>(131 to 157)                          | 5.9<br>(5.4 to 6.5)                     | -73.9<br>(-76.3 to -71.2)                                         |

| Location                         | Mortality (95% UI)                          |                                         |                                                                   |
|----------------------------------|---------------------------------------------|-----------------------------------------|-------------------------------------------------------------------|
|                                  | 2017 counts                                 | 2017 age-standardised rates per 100,000 | Percentage change in age-standardised rates between 1990 and 2017 |
| <b>Eastern Europe</b>            | <b>33 125</b><br><b>(32 284 to 34 221)</b>  | <b>14.3</b><br><b>(13.9 to 14.7)</b>    | <b>-42.0</b><br><b>(-43.7 to -39.7)</b>                           |
| Belarus                          | 990<br>(913 to 1 085)                       | 8.8<br>(8.1 to 9.6)                     | -60.3<br>(-63.7 to -55.4)                                         |
| Estonia                          | 90<br>(78 to 104)                           | 5.8<br>(5.0 to 6.7)                     | -78.1<br>(-81.2 to -74.5)                                         |
| Latvia                           | 212<br>(188 to 237)                         | 9.2<br>(8.1 to 10.4)                    | -71.9<br>(-75.4 to -68.1)                                         |
| Lithuania                        | 325<br>(302 to 351)                         | 9.2<br>(8.5 to 10.1)                    | -67.2<br>(-69.8 to -63.9)                                         |
| Moldova                          | 442<br>(418 to 470)                         | 10.4<br>(9.8 to 11.0)                   | -62.5<br>(-65.0 to -59.9)                                         |
| Russian Federation               | 24 385<br>(23 735 to 25 842)                | 15.1<br>(14.7 to 16.0)                  | -40.4<br>(-42.2 to -37.1)                                         |
| Ukraine                          | 6 681<br>(5 924 to 7 238)                   | 14.0<br>(12.2 to 15.2)                  | -36.7<br>(-44.8 to -31.0)                                         |
| <b>High-income</b>               | <b>99 663</b><br><b>(97 500 to 102 405)</b> | <b>7.8</b><br><b>(7.6 to 8.0)</b>       | <b>-53.0</b><br><b>(-54.2 to -51.6)</b>                           |
| <b>Australasia</b>               | <b>2 023</b><br><b>(1 838 to 2 212)</b>     | <b>6.3</b><br><b>(5.7 to 6.9)</b>       | <b>-61.7</b><br><b>(-65.3 to -57.8)</b>                           |
| Australia                        | 1 661<br>(1 482 to 1 847)                   | 6.1<br>(5.4 to 6.8)                     | -60.4<br>(-64.9 to -55.9)                                         |
| New Zealand                      | 362<br>(341 to 385)                         | 7.6<br>(7.2 to 8.1)                     | -65.3<br>(-67.5 to -63.0)                                         |
| <b>High-income Asia-Pacific</b>  | <b>14 588</b><br><b>(13 967 to 15 248)</b>  | <b>5.1</b><br><b>(4.9 to 5.3)</b>       | <b>-70.4</b><br><b>(-71.8 to -68.8)</b>                           |
| Brunei                           | 68<br>(60 to 75)                            | 16.5<br>(14.8 to 18.0)                  | -49.0<br>(-55.3 to -42.4)                                         |
| Japan                            | 7 681<br>(7 377 to 8 026)                   | 3.8<br>(3.7 to 4.0)                     | -65.2<br>(-66.6 to -63.7)                                         |
| South Korea                      | 6 643<br>(6 143 to 7 170)                   | 9.3<br>(8.6 to 10.0)                    | -75.8<br>(-77.7 to -73.6)                                         |
| Singapore                        | 197<br>(181 to 213)                         | 3.1<br>(2.8 to 3.3)                     | -64.2<br>(-67.1 to -61.2)                                         |
| <b>High-income North America</b> | <b>46 958</b><br><b>(45 107 to 48 711)</b>  | <b>11.6</b><br><b>(11.1 to 12.1)</b>    | <b>-35.6</b><br><b>(-38.6 to -32.8)</b>                           |
| Canada                           | 2 741<br>(2 558 to 2 923)                   | 6.7<br>(6.2 to 7.2)                     | -54.9<br>(-58.2 to -51.6)                                         |
| Greenland                        | 2<br>(2 to 3)                               | 4.1<br>(3.7 to 4.6)                     | -65.6<br>(-71.3 to -57.2)                                         |
| USA                              | 44 214<br>(42 452 to 45 928)                | 12.2<br>(11.6 to 12.6)                  | -33.8<br>(-37.1 to -30.9)                                         |
| <b>Southern Latin America</b>    | <b>9 348</b><br><b>(8 564 to 10 232)</b>    | <b>13.1</b><br><b>(12.0 to 14.3)</b>    | <b>-8.6</b><br><b>(-16.2 to 0.7)</b>                              |
| Argentina                        | 6 457<br>(5 751 to 7 270)                   | 13.6<br>(12.2 to 15.3)                  | 1.0<br>(-10.4 to 14.5)                                            |
| Chile                            | 2 281<br>(1 995 to 2 595)                   | 11.2<br>(9.8 to 12.7)                   | -29.9<br>(-38.2 to -20.0)                                         |
| Uruguay                          | 609<br>(537 to 681)                         | 15.0<br>(13.2 to 16.8)                  | -6.4<br>(-18.5 to 5.4)                                            |
| <b>Western Europe</b>            | <b>26 747</b><br><b>(25 935 to 27 579)</b>  | <b>4.9</b><br><b>(4.7 to 5.0)</b>       | <b>-68.7</b><br><b>(-69.7 to -67.7)</b>                           |
| Andorra                          | 4<br>(3 to 4)                               | 4.1<br>(3.5 to 4.8)                     | -54.4<br>(-63.2 to -42.5)                                         |
| Austria                          | 481<br>(450 to 515)                         | 4.4<br>(4.1 to 4.8)                     | -73.6<br>(-75.5 to -71.3)                                         |
| Belgium                          | 1 035<br>(969 to 1 107)                     | 7.0<br>(6.6 to 7.5)                     | -64.8<br>(-67.2 to -62.0)                                         |
| Cyprus                           | 152<br>(137 to 167)                         | 10.2<br>(9.3 to 11.3)                   | -60.1<br>(-67.5 to -53.9)                                         |
| Denmark                          | 283<br>(263 to 304)                         | 4.0<br>(3.7 to 4.3)                     | -69.8<br>(-72.2 to -67.2)                                         |
| Finland                          | 289<br>(270 to 310)                         | 4.2<br>(3.9 to 4.5)                     | -69.3<br>(-71.7 to -66.6)                                         |

| Location                           | Mortality (95% UI)                            |                                         |                                                                   |
|------------------------------------|-----------------------------------------------|-----------------------------------------|-------------------------------------------------------------------|
|                                    | 2017 counts                                   | 2017 age-standardised rates per 100,000 | Percentage change in age-standardised rates between 1990 and 2017 |
| France                             | 4 053<br>(3 815 to 4 346)                     | 5.5<br>(5.1 to 5.9)                     | -70.4<br>(-72.4 to -68.0)                                         |
| Germany                            | 4 716<br>(4 218 to 5 274)                     | 4.5<br>(4.0 to 5.0)                     | -67.9<br>(-71.3 to -63.8)                                         |
| Greece                             | 1 221<br>(1 144 to 1 302)                     | 9.9<br>(9.2 to 10.6)                    | -49.7<br>(-53.0 to -46.2)                                         |
| Iceland                            | 14<br>(13 to 15)                              | 3.7<br>(3.4 to 4.0)                     | -67.3<br>(-70.1 to -64.3)                                         |
| Ireland                            | 188<br>(174 to 203)                           | 3.5<br>(3.2 to 3.8)                     | -74.2<br>(-76.3 to -71.8)                                         |
| Israel                             | 632<br>(590 to 678)                           | 6.3<br>(5.9 to 6.8)                     | -42.5<br>(-46.6 to -38.1)                                         |
| Italy                              | 5 710<br>(5 333 to 6 090)                     | 6.1<br>(5.7 to 6.5)                     | -63.6<br>(-66.0 to -60.9)                                         |
| Luxembourg                         | 38<br>(34 to 42)                              | 5.4<br>(4.8 to 6.0)                     | -71.7<br>(-74.8 to -68.5)                                         |
| Malta                              | 17<br>(16 to 19)                              | 3.4<br>(3.2 to 3.7)                     | -52.9<br>(-56.9 to -48.2)                                         |
| Netherlands                        | 856<br>(807 to 909)                           | 3.7<br>(3.5 to 4.0)                     | -63.3<br>(-65.8 to -60.5)                                         |
| Norway                             | 215<br>(208 to 223)                           | 3.4<br>(3.3 to 3.6)                     | -64.9<br>(-66.3 to -63.1)                                         |
| Portugal                           | 961<br>(892 to 1 032)                         | 6.5<br>(6.0 to 7.1)                     | -79.7<br>(-81.3 to -77.9)                                         |
| Spain                              | 2 452<br>(2 299 to 2 625)                     | 4.2<br>(3.9 to 4.5)                     | -79.6<br>(-81.0 to -77.9)                                         |
| Sweden                             | 390<br>(365 to 418)                           | 3.1<br>(2.9 to 3.4)                     | -67.9<br>(-70.2 to -65.5)                                         |
| Switzerland                        | 334<br>(310 to 365)                           | 3.1<br>(2.8 to 3.3)                     | -77.5<br>(-79.3 to -75.2)                                         |
| United Kingdom                     | 2 679<br>(2 618 to 2 766)                     | 3.5<br>(3.4 to 3.6)                     | -63.2<br>(-64.2 to -61.9)                                         |
| <b>Latin America and Caribbean</b> | <b>111 293</b><br><b>(106 737 to 115 259)</b> | <b>18.6</b><br><b>(17.9 to 19.3)</b>    | <b>-35.8</b><br><b>(-38.5 to -32.9)</b>                           |
| <b>Andean Latin America</b>        | <b>11 169</b><br><b>(10 159 to 12 189)</b>    | <b>18.8</b><br><b>(17.1 to 20.4)</b>    | <b>-28.4</b><br><b>(-35.7 to -20.6)</b>                           |
| Bolivia                            | 2 128<br>(1 567 to 2 609)                     | 20.8<br>(15.8 to 25.4)                  | -53.4<br>(-65.4 to -40.7)                                         |
| Ecuador                            | 4 465<br>(4 018 to 4 977)                     | 27.2<br>(24.5 to 30.3)                  | -10.4<br>(-19.8 to 0.2)                                           |
| Peru                               | 4 577<br>(3 901 to 5 316)                     | 14.0<br>(12.0 to 16.3)                  | -26.2<br>(-37.8 to -12.4)                                         |
| <b>Caribbean</b>                   | <b>10 539</b><br><b>(8 887 to 12 161)</b>     | <b>22.1</b><br><b>(18.6 to 25.4)</b>    | <b>-22.7</b><br><b>(-30.7 to -12.9)</b>                           |
| Antigua and Barbuda                | 7<br>(6 to 7)                                 | 7.0<br>(6.3 to 7.8)                     | -37.0<br>(-44.4 to -29.0)                                         |
| The Bahamas                        | 60<br>(54 to 67)                              | 15.1<br>(13.6 to 16.9)                  | -29.0<br>(-37.3 to -19.3)                                         |
| Barbados                           | 31<br>(28 to 34)                              | 8.9<br>(8.1 to 9.9)                     | -32.0<br>(-39.1 to -23.8)                                         |
| Belize                             | 72<br>(65 to 78)                              | 19.2<br>(17.4 to 20.7)                  | -20.1<br>(-34.4 to -7.3)                                          |
| Bermuda                            | 7<br>(6 to 7)                                 | 8.0<br>(7.1 to 9.0)                     | -59.7<br>(-64.5 to -54.3)                                         |
| Cuba                               | 1 121<br>(998 to 1 276)                       | 8.1<br>(7.2 to 9.2)                     | -61.7<br>(-66.1 to -56.4)                                         |
| Dominica                           | 12<br>(11 to 13)                              | 15.7<br>(14.3 to 17.3)                  | -13.5<br>(-22.8 to -3.3)                                          |
| Dominican Republic                 | 3 152<br>(2 644 to 3 659)                     | 30.0<br>(25.2 to 34.9)                  | 35.5<br>(11.9 to 64.0)                                            |
| Grenada                            | 12<br>(11 to 13)                              | 9.6<br>(8.7 to 10.4)                    | -41.6<br>(-47.4 to -35.0)                                         |
| Guyana                             | 118<br>(101 to 137)                           | 15.9<br>(13.7 to 18.5)                  | -15.5<br>(-28.3 to -1.2)                                          |

| Location                            | Mortality (95% UI)                      |                                         |                                                                   |
|-------------------------------------|-----------------------------------------|-----------------------------------------|-------------------------------------------------------------------|
|                                     | 2017 counts                             | 2017 age-standardised rates per 100,000 | Percentage change in age-standardised rates between 1990 and 2017 |
| Haiti                               | 4 487<br>(3 029 to 6 032)               | 42.9<br>(28.3 to 58.7)                  | -39.8<br>(-52.0 to -23.7)                                         |
| Jamaica                             | 277<br>(222 to 330)                     | 9.3<br>(7.5 to 11.1)                    | 94.2<br>(52.3 to 134.1)                                           |
| Puerto Rico                         | 446<br>(411 to 483)                     | 10.1<br>(9.3 to 11.0)                   | -47.9<br>(-52.5 to -43.0)                                         |
| Saint Lucia                         | 25<br>(22 to 28)                        | 12.9<br>(11.5 to 14.3)                  | -39.9<br>(-47.0 to -31.9)                                         |
| Saint Vincent and the Grenadines    | 12<br>(11 to 13)                        | 9.5<br>(8.6 to 10.4)                    | -18.2<br>(-27.3 to -7.9)                                          |
| Suriname                            | 99<br>(86 to 112)                       | 16.8<br>(14.7 to 19.0)                  | -28.6<br>(-39.1 to -17.6)                                         |
| Trinidad and Tobago                 | 210<br>(171 to 255)                     | 13.9<br>(11.3 to 16.8)                  | -13.8<br>(-29.6 to 5.1)                                           |
| Virgin Islands                      | 15<br>(13 to 17)                        | 11.2<br>(9.8 to 12.7)                   | -36.1<br>(-46.0 to -24.2)                                         |
| <b>Central Latin America</b>        | <b>41 811<br/>(39 363 to 43 874)</b>    | <b>16.4<br/>(15.4 to 17.2)</b>          | <b>-38.4<br/>(-42.5 to -35.3)</b>                                 |
| Colombia                            | 7 437<br>(6 572 to 8 381)               | 14.2<br>(12.6 to 16.0)                  | -41.6<br>(-49.0 to -33.8)                                         |
| Costa Rica                          | 782<br>(704 to 860)                     | 15.7<br>(14.1 to 17.2)                  | -20.1<br>(-28.1 to -11.1)                                         |
| El Salvador                         | 1 282<br>(1 061 to 1 554)               | 21.4<br>(17.7 to 25.9)                  | -34.4<br>(-46.2 to -19.6)                                         |
| Guatemala                           | 2 692<br>(2 351 to 3 087)               | 17.4<br>(15.1 to 19.8)                  | -8.7<br>(-21.1 to 4.6)                                            |
| Honduras                            | 1 294<br>(979 to 1 581)                 | 16.5<br>(12.3 to 20.2)                  | -30.7<br>(-46.8 to -11.2)                                         |
| Mexico                              | 20 170<br>(19 427 to 20 909)            | 16.0<br>(15.4 to 16.6)                  | -41.5<br>(-44.3 to -39.2)                                         |
| Nicaragua                           | 654<br>(558 to 766)                     | 11.0<br>(9.5 to 12.8)                   | -50.6<br>(-58.2 to -42.5)                                         |
| Panama                              | 512<br>(469 to 557)                     | 12.9<br>(11.8 to 14.0)                  | -41.8<br>(-47.2 to -36.3)                                         |
| Venezuela                           | 6 988<br>(5 856 to 8 378)               | 22.0<br>(18.5 to 26.3)                  | -30.0<br>(-41.6 to -16.7)                                         |
| <b>Tropical Latin America</b>       | <b>47 773<br/>(45 698 to 49 554)</b>    | <b>20.4<br/>(19.6 to 21.2)</b>          | <b>-37.0<br/>(-39.8 to -33.6)</b>                                 |
| Brazil                              | 46 282<br>(44 196 to 47 990)            | 20.4<br>(19.5 to 21.1)                  | -37.9<br>(-40.7 to -34.4)                                         |
| Paraguay                            | 1 491<br>(1 221 to 1 816)               | 22.3<br>(18.3 to 27.1)                  | 31.1<br>(5.1 to 63.6)                                             |
| <b>North Africa and Middle East</b> | <b>131 692<br/>(115 130 to 152 258)</b> | <b>23.2<br/>(20.1 to 27.0)</b>          | <b>-43.9<br/>(-50.8 to -35.6)</b>                                 |
| <b>North Africa and Middle East</b> | <b>131 692<br/>(115 130 to 152 258)</b> | <b>23.2<br/>(20.1 to 27.0)</b>          | <b>-43.9<br/>(-50.8 to -35.6)</b>                                 |
| Afghanistan                         | 8 692<br>(6 911 to 10 727)              | 33.3<br>(26.8 to 40.8)                  | -36.3<br>(-55.9 to 83.5)                                          |
| Algeria                             | 6 905<br>(5 516 to 11 141)              | 17.4<br>(13.8 to 28.4)                  | -50.8<br>(-58.3 to -41.9)                                         |
| Bahrain                             | 128<br>(113 to 147)                     | 9.8<br>(8.7 to 11.0)                    | -60.4<br>(-65.0 to -54.0)                                         |
| Egypt                               | 26 946<br>(19 277 to 33 875)            | 31.9<br>(21.7 to 41.0)                  | -39.5<br>(-53.4 to -26.9)                                         |
| Iran                                | 21 124<br>(20 681 to 22 147)            | 26.1<br>(25.6 to 27.4)                  | -51.7<br>(-59.6 to -46.7)                                         |
| Iraq                                | 3 773<br>(3 433 to 4 205)               | 9.5<br>(8.7 to 10.5)                    | -64.6<br>(-70.6 to -49.8)                                         |
| Jordan                              | 1 110<br>(989 to 1 249)                 | 11.7<br>(10.4 to 13.1)                  | -54.9<br>(-61.7 to -46.2)                                         |
| Kuwait                              | 529<br>(477 to 575)                     | 13.9<br>(12.4 to 15.1)                  | -48.5<br>(-52.8 to -43.6)                                         |
| Lebanon                             | 562<br>(376 to 689)                     | 6.9<br>(4.5 to 8.3)                     | -47.8<br>(-67.0 to -33.8)                                         |

| Location                                      | Mortality (95% UI)                            |                                         |                                                                   |
|-----------------------------------------------|-----------------------------------------------|-----------------------------------------|-------------------------------------------------------------------|
|                                               | 2017 counts                                   | 2017 age-standardised rates per 100,000 | Percentage change in age-standardised rates between 1990 and 2017 |
| Libya                                         | 1 701<br>(871 to 2 607)                       | 25.3<br>(13.0 to 39.2)                  | -27.9<br>(-55.1 to -5.6)                                          |
| Morocco                                       | 7 264<br>(5 384 to 11 891)                    | 20.6<br>(15.2 to 33.9)                  | -43.3<br>(-57.3 to -28.0)                                         |
| Palestine                                     | 355<br>(313 to 407)                           | 8.5<br>(7.7 to 9.5)                     | -50.1<br>(-58.1 to -39.6)                                         |
| Oman                                          | 1 950<br>(1 572 to 2 346)                     | 47.1<br>(38.4 to 56.1)                  | -52.4<br>(-63.2 to -38.6)                                         |
| Qatar                                         | 574<br>(462 to 704)                           | 24.8<br>(20.1 to 30.4)                  | -33.4<br>(-48.8 to -13.4)                                         |
| Saudi Arabia                                  | 12 039<br>(8 422 to 14 884)                   | 36.7<br>(25.9 to 44.1)                  | -28.2<br>(-56.2 to -4.2)                                          |
| Sudan                                         | 10 692<br>(8 170 to 15 862)                   | 30.4<br>(22.9 to 47.3)                  | -55.5<br>(-66.0 to -38.1)                                         |
| Syria                                         | 1 748<br>(1 418 to 2 110)                     | 11.6<br>(9.3 to 13.8)                   | -45.6<br>(-60.7 to -29.1)                                         |
| Tunisia                                       | 3 669<br>(2 913 to 4 525)                     | 30.2<br>(24.1 to 37.1)                  | -38.7<br>(-55.2 to -20.6)                                         |
| Turkey                                        | 8 604<br>(7 763 to 9 520)                     | 10.3<br>(9.3 to 11.4)                   | -38.7<br>(-47.5 to -28.0)                                         |
| United Arab Emirates                          | 3 649<br>(2 803 to 4 596)                     | 49.9<br>(39.5 to 61.1)                  | -17.2<br>(-45.1 to 17.2)                                          |
| Yemen                                         | 9 556<br>(7 228 to 13 629)                    | 38.4<br>(28.8 to 56.0)                  | -44.8<br>(-60.1 to 12.0)                                          |
| <b>South Asia</b>                             | <b>290 540</b><br><b>(253 208 to 313 209)</b> | <b>17.9</b><br><b>(15.4 to 19.3)</b>    | <b>-2.8</b><br><b>(-14.0 to 7.0)</b>                              |
| <b>South Asia</b>                             | <b>290 540</b><br><b>(253 208 to 313 209)</b> | <b>17.9</b><br><b>(15.4 to 19.3)</b>    | <b>-2.8</b><br><b>(-14.0 to 7.0)</b>                              |
| Bangladesh                                    | 11 798<br>(9 120 to 13 748)                   | 8.2<br>(6.5 to 9.6)                     | 4.9<br>(-16.6 to 35.8)                                            |
| Bhutan                                        | 70<br>(51 to 86)                              | 7.9<br>(5.9 to 9.6)                     | -57.4<br>(-68.0 to -43.7)                                         |
| India                                         | 218 876<br>(201 734 to 231 141)               | 17.2<br>(15.7 to 18.1)                  | -9.2<br>(-18.3 to -0.6)                                           |
| Nepal                                         | 6 787<br>(3 920 to 10 235)                    | 26.6<br>(15.2 to 39.3)                  | 12.7<br>(-21.9 to 55.9)                                           |
| Pakistan                                      | 53 009<br>(32 258 to 69 115)                  | 29.7<br>(17.9 to 38.8)                  | 29.8<br>(2.8 to 63.0)                                             |
| <b>Southeast Asia, East Asia, and Oceania</b> | <b>393 363</b><br><b>(374 675 to 408 773)</b> | <b>16.3</b><br><b>(15.6 to 16.9)</b>    | <b>-27.2</b><br><b>(-34.3 to -22.1)</b>                           |
| <b>East Asia</b>                              | <b>275 976</b><br><b>(261 267 to 288 588)</b> | <b>15.6</b><br><b>(14.9 to 16.3)</b>    | <b>-22.4</b><br><b>(-31.0 to -15.9)</b>                           |
| China                                         | 261 802<br>(247 924 to 273 651)               | 15.6<br>(14.8 to 16.2)                  | -21.8<br>(-30.7 to -14.9)                                         |
| North Korea                                   | 5 744<br>(3 772 to 8 746)                     | 20.1<br>(13.5 to 30.5)                  | 36.2<br>(-1.6 to 80.1)                                            |
| Taiwan (Province of China)                    | 3 984<br>(3 752 to 4 257)                     | 13.1<br>(12.4 to 14.0)                  | -66.6<br>(-68.6 to -64.4)                                         |
| <b>Oceania</b>                                | <b>3 373</b><br><b>(2 747 to 4 069)</b>       | <b>29.9</b><br><b>(24.7 to 35.7)</b>    | <b>-19.7</b><br><b>(-35.2 to -2.2)</b>                            |
| American Samoa                                | 4<br>(4 to 5)                                 | 8.9<br>(8.1 to 9.6)                     | -27.7<br>(-40.3 to -15.7)                                         |
| Federated States of Micronesia                | 16<br>(11 to 21)                              | 17.6<br>(12.2 to 22.1)                  | -17.9<br>(-43.0 to 8.7)                                           |
| Fiji                                          | 84<br>(73 to 97)                              | 10.0<br>(8.7 to 11.4)                   | -21.1<br>(-38.4 to -3.7)                                          |
| Guam                                          | 23<br>(20 to 25)                              | 13.6<br>(12.2 to 15.0)                  | -16.5<br>(-29.5 to -4.1)                                          |
| Kiribati                                      | 12<br>(9 to 15)                               | 11.2<br>(8.8 to 13.5)                   | -7.7<br>(-29.3 to 16.7)                                           |
| Marshall Islands                              | 12<br>(9 to 15)                               | 24.5<br>(19.4 to 29.4)                  | -14.4<br>(-31.3 to 5.5)                                           |
| Northern Mariana Islands                      | 5<br>(4 to 6)                                 | 11.1<br>(9.7 to 12.4)                   | -37.5<br>(-52.0 to -20.3)                                         |

| Location                          | Mortality (95% UI)                            |                                         |                                                                   |
|-----------------------------------|-----------------------------------------------|-----------------------------------------|-------------------------------------------------------------------|
|                                   | 2017 counts                                   | 2017 age-standardised rates per 100,000 | Percentage change in age-standardised rates between 1990 and 2017 |
| Papua New Guinea                  | 2 831<br>(2 243 to 3 484)                     | 34.7<br>(28.0 to 42.2)                  | -26.6<br>(-42.1 to -8.6)                                          |
| Samoa                             | 18<br>(14 to 25)                              | 10.9<br>(8.7 to 15.2)                   | -16.0<br>(-34.5 to 5.0)                                           |
| Solomon Islands                   | 117<br>(91 to 149)                            | 21.7<br>(16.8 to 27.8)                  | -16.3<br>(-35.0 to 5.3)                                           |
| Tonga                             | 11<br>(9 to 13)                               | 12.1<br>(10.1 to 14.0)                  | -7.8<br>(-32.2 to 14.5)                                           |
| Vanuatu                           | 52<br>(36 to 72)                              | 21.0<br>(14.8 to 28.6)                  | -5.2<br>(-30.5 to 31.7)                                           |
| <b>Southeast Asia</b>             | <b>114 014</b><br><b>(106 883 to 120 762)</b> | <b>17.3</b><br><b>(16.3 to 18.4)</b>    | <b>-41.1</b><br><b>(-46.3 to -36.4)</b>                           |
| Cambodia                          | 3 981<br>(3 155 to 5 142)                     | 27.7<br>(22.1 to 35.2)                  | -40.5<br>(-52.3 to -22.6)                                         |
| Indonesia                         | 35 626<br>(32 587 to 38 492)                  | 14.5<br>(13.2 to 15.7)                  | -51.2<br>(-56.4 to -46.5)                                         |
| Laos                              | 1 690<br>(1 275 to 2 112)                     | 26.8<br>(20.5 to 33.5)                  | -45.1<br>(-58.2 to -28.4)                                         |
| Malaysia                          | 6 946<br>(6 127 to 7 794)                     | 23.3<br>(20.6 to 26.1)                  | -26.2<br>(-42.8 to -11.9)                                         |
| Maldives                          | 33<br>(25 to 60)                              | 8.4<br>(6.3 to 14.7)                    | -64.7<br>(-70.1 to -52.0)                                         |
| Mauritius                         | 165<br>(150 to 181)                           | 11.4<br>(10.4 to 12.5)                  | -22.5<br>(-30.2 to -14.3)                                         |
| Myanmar                           | 10 942<br>(9 203 to 13 089)                   | 20.7<br>(17.6 to 24.6)                  | -47.5<br>(-58.0 to -34.7)                                         |
| Philippines                       | 10 940<br>(9 482 to 12 600)                   | 11.6<br>(10.1 to 13.3)                  | 4.8<br>(-10.5 to 23.1)                                            |
| Sri Lanka                         | 2 795<br>(2 318 to 3 320)                     | 12.3<br>(10.2 to 14.6)                  | -19.9<br>(-33.8 to -3.0)                                          |
| Seychelles                        | 14<br>(12 to 16)                              | 13.4<br>(11.6 to 15.0)                  | 15.0<br>(1.2 to 28.8)                                             |
| Thailand                          | 19 183<br>(16 832 to 21 609)                  | 24.7<br>(21.8 to 27.5)                  | -41.9<br>(-52.6 to -31.9)                                         |
| Timor-Leste                       | 118<br>(67 to 200)                            | 10.5<br>(6.2 to 18.3)                   | -31.8<br>(-56.6 to -11.3)                                         |
| Vietnam                           | 21 431<br>(17 934 to 24 368)                  | 21.4<br>(18.2 to 24.2)                  | -24.3<br>(-39.7 to -6.9)                                          |
| <b>Sub-Saharan Africa</b>         | <b>161 647</b><br><b>(150 086 to 173 753)</b> | <b>22.0</b><br><b>(20.5 to 23.6)</b>    | <b>-31.3</b><br><b>(-38.7 to -22.7)</b>                           |
| <b>Central sub-Saharan Africa</b> | <b>32 666</b><br><b>(27 105 to 38 467)</b>    | <b>31.0</b><br><b>(26.4 to 36.3)</b>    | <b>-29.0</b><br><b>(-40.3 to -7.3)</b>                            |
| Angola                            | 6 781<br>(5 592 to 8 207)                     | 28.6<br>(23.5 to 34.9)                  | -50.1<br>(-61.8 to -16.5)                                         |
| Central African Republic          | 3 495<br>(1 985 to 4 570)                     | 85.5<br>(50.7 to 111.2)                 | 5.6<br>(-21.9 to 62.3)                                            |
| Congo (Brazzaville)               | 1 229<br>(944 to 1 552)                       | 28.6<br>(22.4 to 35.4)                  | -43.6<br>(-56.3 to -26.7)                                         |
| DR Congo                          | 20 502<br>(15 783 to 25 532)                  | 28.9<br>(23.1 to 35.8)                  | -20.8<br>(-36.3 to 9.4)                                           |
| Equatorial Guinea                 | 225<br>(154 to 319)                           | 20.9<br>(14.3 to 30.2)                  | -68.0<br>(-78.2 to -54.1)                                         |
| Gabon                             | 435<br>(342 to 548)                           | 28.5<br>(22.7 to 35.7)                  | -34.7<br>(-49.4 to -18.5)                                         |
| <b>Eastern sub-Saharan Africa</b> | <b>52 980</b><br><b>(46 622 to 58 814)</b>    | <b>21.5</b><br><b>(18.9 to 23.5)</b>    | <b>-35.0</b><br><b>(-43.8 to -23.2)</b>                           |
| Burundi                           | 2 287<br>(1 799 to 3 045)                     | 35.1<br>(27.7 to 46.6)                  | -33.8<br>(-47.7 to -15.3)                                         |
| Comoros                           | 113<br>(94 to 137)                            | 20.7<br>(17.2 to 24.8)                  | -42.9<br>(-55.0 to -27.9)                                         |
| Djibouti                          | 175<br>(125 to 251)                           | 23.0<br>(16.6 to 32.0)                  | -27.2<br>(-47.9 to 4.7)                                           |
| Eritrea                           | 1 287<br>(913 to 1 627)                       | 33.0<br>(24.6 to 40.6)                  | -40.2<br>(-54.2 to -10.5)                                         |

| Location                           | Mortality (95% UI)                         |                                         |                                                                   |
|------------------------------------|--------------------------------------------|-----------------------------------------|-------------------------------------------------------------------|
|                                    | 2017 counts                                | 2017 age-standardised rates per 100,000 | Percentage change in age-standardised rates between 1990 and 2017 |
| Ethiopia                           | 9 742<br>(8 867 to 10 837)                 | 15.4<br>(14.0 to 16.9)                  | -57.2<br>(-64.7 to -40.4)                                         |
| Kenya                              | 5 503<br>(5 015 to 6 334)                  | 18.2<br>(16.5 to 20.6)                  | -12.9<br>(-41.0 to 2.7)                                           |
| Madagascar                         | 3 475<br>(2 827 to 4 271)                  | 20.8<br>(17.0 to 25.1)                  | -35.8<br>(-47.5 to -21.7)                                         |
| Malawi                             | 2 227<br>(1 865 to 2 628)                  | 19.4<br>(16.7 to 22.4)                  | -45.6<br>(-63.4 to 13.2)                                          |
| Mozambique                         | 5 078<br>(4 228 to 5 948)                  | 27.5<br>(23.3 to 31.9)                  | -17.0<br>(-36.1 to 4.8)                                           |
| Rwanda                             | 2 661<br>(1 822 to 3 743)                  | 33.3<br>(22.7 to 44.5)                  | -45.2<br>(-57.4 to -27.8)                                         |
| Somalia                            | 5 154<br>(2 772 to 7 410)                  | 51.1<br>(27.8 to 72.0)                  | 0.8<br>(-34.2 to 86.7)                                            |
| South Sudan                        | 1 761<br>(1 291 to 2 405)                  | 28.3<br>(20.9 to 39.0)                  | -11.2<br>(-38.3 to 48.2)                                          |
| Tanzania                           | 5 560<br>(4 790 to 6 411)                  | 15.4<br>(13.4 to 17.7)                  | -32.6<br>(-47.5 to 1.0)                                           |
| Uganda                             | 5 826<br>(4 239 to 7 496)                  | 26.1<br>(18.9 to 33.3)                  | 1.3<br>(-29.9 to 34.6)                                            |
| Zambia                             | 2 098<br>(1 794 to 2 435)                  | 19.8<br>(17.2 to 22.6)                  | -45.1<br>(-57.3 to -23.3)                                         |
| <b>Southern sub-Saharan Africa</b> | <b>20 157</b><br><b>(18 838 to 21 651)</b> | <b>27.6</b><br><b>(26.0 to 29.5)</b>    | <b>-37.0</b><br><b>(-46.3 to -30.3)</b>                           |
| Botswana                           | 299<br>(253 to 341)                        | 15.1<br>(12.7 to 17.1)                  | -32.7<br>(-45.8 to -15.2)                                         |
| Lesotho                            | 803<br>(635 to 981)                        | 45.0<br>(35.7 to 54.4)                  | 20.9<br>(-18.9 to 60.7)                                           |
| Namibia                            | 451<br>(357 to 572)                        | 22.0<br>(17.7 to 27.5)                  | -36.2<br>(-50.1 to -19.7)                                         |
| South Africa                       | 15 504<br>(14 441 to 16 826)               | 28.2<br>(26.5 to 30.4)                  | -44.2<br>(-50.5 to -38.8)                                         |
| Swaziland                          | 371<br>(284 to 460)                        | 37.7<br>(28.8 to 46.2)                  | 1.5<br>(-33.3 to 35.6)                                            |
| Zimbabwe                           | 2 730<br>(1 939 to 3 715)                  | 25.4<br>(18.4 to 34.2)                  | 7.8<br>(-32.2 to 42.0)                                            |
| <b>Western sub-Saharan Africa</b>  | <b>55 845</b><br><b>(49 708 to 62 806)</b> | <b>18.7</b><br><b>(16.8 to 21.0)</b>    | <b>-24.1</b><br><b>(-34.2 to -12.6)</b>                           |
| Benin                              | 3 093<br>(1 880 to 4 280)                  | 41.6<br>(25.0 to 56.0)                  | -31.0<br>(-43.6 to -15.1)                                         |
| Burkina Faso                       | 3 497<br>(2 885 to 4 178)                  | 24.3<br>(20.2 to 28.1)                  | -12.4<br>(-29.6 to 9.9)                                           |
| Cameroon                           | 4 108<br>(3 215 to 5 192)                  | 23.0<br>(18.3 to 28.4)                  | -34.1<br>(-49.8 to -16.7)                                         |
| Cape Verde                         | 43<br>(37 to 49)                           | 8.4<br>(7.2 to 9.5)                     | 12.3<br>(-4.4 to 32.1)                                            |
| Chad                               | 2 602<br>(2 107 to 3 328)                  | 25.5<br>(20.7 to 32.6)                  | 10.9<br>(-10.6 to 35.9)                                           |
| Cote d'Ivoire                      | 3 631<br>(3 055 to 4 329)                  | 22.1<br>(18.8 to 25.8)                  | -20.0<br>(-36.9 to -1.3)                                          |
| The Gambia                         | 286<br>(218 to 360)                        | 21.1<br>(16.8 to 25.3)                  | -8.0<br>(-30.2 to 16.8)                                           |
| Ghana                              | 5 381<br>(4 579 to 6 363)                  | 24.4<br>(21.1 to 28.0)                  | -3.7<br>(-28.5 to 20.7)                                           |
| Guinea                             | 1 978<br>(1 667 to 2 329)                  | 24.4<br>(20.7 to 28.7)                  | -20.9<br>(-36.6 to -2.7)                                          |
| Guinea-Bissau                      | 388<br>(304 to 488)                        | 32.6<br>(27.2 to 39.3)                  | -42.1<br>(-54.0 to -27.6)                                         |
| Liberia                            | 499<br>(406 to 641)                        | 16.0<br>(13.1 to 19.2)                  | -39.1<br>(-51.3 to -24.0)                                         |
| Mali                               | 3 109<br>(2 493 to 3 997)                  | 20.1<br>(16.5 to 26.8)                  | -46.1<br>(-56.1 to -31.4)                                         |
| Mauritania                         | 674<br>(571 to 785)                        | 23.4<br>(19.3 to 27.4)                  | -44.7<br>(-53.5 to -33.3)                                         |

| Location              | Mortality (95% UI)           |                                         |                                                                   |
|-----------------------|------------------------------|-----------------------------------------|-------------------------------------------------------------------|
|                       | 2017 counts                  | 2017 age-standardised rates per 100,000 | Percentage change in age-standardised rates between 1990 and 2017 |
| Niger                 | 2 542<br>(1 856 to 3 410)    | 18.1<br>(13.3 to 24.3)                  | -34.4<br>(-45.7 to -17.5)                                         |
| Nigeria               | 19 810<br>(13 745 to 25 758) | 13.5<br>(9.8 to 18.0)                   | -28.3<br>(-46.2 to -3.2)                                          |
| Sao Tome and Principe | 24<br>(15 to 30)             | 15.9<br>(9.9 to 20.2)                   | 8.4<br>(-24.8 to 40.5)                                            |
| Senegal               | 1 800<br>(1 454 to 2 679)    | 17.7<br>(14.5 to 24.7)                  | -19.6<br>(-33.3 to -1.7)                                          |
| Sierra Leone          | 1 245<br>(1 041 to 1 506)    | 22.7<br>(19.2 to 27.5)                  | -20.5<br>(-35.4 to 2.4)                                           |
| Togo                  | 1 135<br>(917 to 1 406)      | 22.5<br>(18.5 to 27.1)                  | -16.1<br>(-38.6 to 8.0)                                           |
