# Supplementary material for: Morbidity and mortality from road injuries: results from the Global Burden of Disease Study 2017
Source: PubMed Central journal article supplement (PMC7571357; doi:10.1136/injuryprev-2019-043302), 2020-01-08
Supplement: injuryprev-2019-043302supp005.pdf [file injuryprev-2019-043302supp005.pdf]

**Table 3: YLLs, YLDs, and DALYs for 2017 and percentage change of age-standardised rates between 1990 and 2017 by location for road injuries**

| Location                                                | YLL (95% UI)               |                                         |                                                                   |                           | YLD (95% UI)                            |                                                                   |                            |                                         | DALY (95% UI)                                                     |                              |                                         |                                                                   |
|---------------------------------------------------------|----------------------------|-----------------------------------------|-------------------------------------------------------------------|---------------------------|-----------------------------------------|-------------------------------------------------------------------|----------------------------|-----------------------------------------|-------------------------------------------------------------------|------------------------------|-----------------------------------------|-------------------------------------------------------------------|
|                                                         | 2017 counts                | 2017 age-standardised rates per 100,000 | Percentage change in age-standardised rates between 1990 and 2017 | 2017 counts               | 2017 age-standardised rates per 100,000 | Percentage change in age-standardised rates between 1990 and 2017 | 2017 counts                | 2017 age-standardised rates per 100,000 | Percentage change in age-standardised rates between 1990 and 2017 | 2017 counts                  | 2017 age-standardised rates per 100,000 | Percentage change in age-standardised rates between 1990 and 2017 |
| <b>Global</b>                                           | 57 638 366                 | 745                                     | 34.4                                                              | 10 159 667                | 126                                     | 2.2                                                               | 67 798 033                 | 871                                     | 33.8                                                              | 125 436 400                  | 1000                                    | 38.8                                                              |
| <b>Low SDI</b>                                          | (55 500 786 to 59 139 193) | (718 to 767)                            | (38.5 to 30.4)                                                    | (7 272 042 to 13 618 818) | (60 to 169)                             | (0.3 to 0.0)                                                      | (64 337 599 to 71 454 588) | 821                                     | (35.0 to 26.9)                                                    | (118 741 137 to 126 129 265) | 1000                                    | (38.0 to 39.6)                                                    |
| <b>Low-middle SDI</b>                                   | (10 166 444 to 11 594 703) | (834 to 943)                            | (13.2 to 2.0)                                                     | (837 927 to 1 178 872)    | (6 to 19)                               | (4.2 to 0.1)                                                      | (10 984 026 to 12 569 331) | 917                                     | (15.1 to 8.5)                                                     | (15 442 162 to 18 508 695)   | 1000                                    | (20.9 to 17.8)                                                    |
| <b>Middle SDI</b>                                       | (15 695 391)               | 923                                     | -7.3                                                              | 1 490 456                 | 103                                     | 15.1                                                              | 17 095 427                 | 1023                                    | -4.6                                                              | 19 550 300                   | 1000                                    | -29.8                                                             |
| <b>High-middle SDI</b>                                  | (14 472 161 to 16 583 245) | (855 to 979)                            | (32.6 to 20.1)                                                    | (9 076 899 to 13 936 281) | (73 to 124)                             | (12.2 to 18.8)                                                    | (15 842 162 to 18 508 695) | 917                                     | (15.1 to 8.5)                                                     | (15 442 162 to 18 508 695)   | 1000                                    | (20.9 to 17.8)                                                    |
| <b>High SDI</b>                                         | (16 782 061)               | 769                                     | -34.5                                                             | 2 768 239                 | 120                                     | 30.2                                                              | 19 550 300                 | 889                                     | -29.8                                                             | 22 842 162                   | 1000                                    | -34.2                                                             |
| <b>Central Europe, Eastern Europe, and Central Asia</b> | (16 027 262 to 17 229 206) | (740 to 794)                            | (34.4 to 30.8)                                                    | (8 984 422 to 13 717 378) | (86 to 161)                             | (25.5 to 35.2)                                                    | (18 114 456 to 20 647 763) | 869                                     | (44.6 to 34.2)                                                    | (22 842 162 to 26 000 000)   | 1000                                    | (34.6 to 26.0)                                                    |
| <b>Central Asia</b>                                     | (10 200 177)               | 705                                     | -40.0                                                             | 2 643 895                 | 154                                     | 14.4                                                              | 19 550 300                 | 889                                     | -29.8                                                             | 22 842 162                   | 1000                                    | -34.2                                                             |
| <b>Armenia</b>                                          | (9 782 301 to 10 567 843)  | (678 to 727)                            | (44.4 to 36.5)                                                    | (3 915 102 to 4 602 340)  | (111 to 209)                            | (6.4 to 12.1)                                                     | (12 004 007 to 13 868 811) | (806 to 917)                            | (39.0 to 31.1)                                                    | (18 114 456 to 20 647 763)   | 1000                                    | (34.6 to 26.0)                                                    |
| <b>Azerbaijan</b>                                       | 1 997 709                  | 350                                     | -39.3                                                             | 2 302 189                 | 151                                     | 15.1                                                              | 4 200 000                  | 609                                     | -51.9                                                             | 5 000 000                    | 1000                                    | -51.9                                                             |
| <b>Georgia</b>                                          | (8 669 311 to 9 616 500)   | (604 to 658)                            | (40.4 to 30.1)                                                    | (1 647 313 to 1 931 989)  | (107 to 123)                            | (16.4 to 14.6)                                                    | (5 596 311 to 6 201 358)   | (465 to 542)                            | (54.0 to 40.8)                                                    | (12 004 007 to 13 868 811)   | 1000                                    | (39.0 to 31.1)                                                    |
| <b>Central Europe</b>                                   | 2 467 734                  | 592                                     | -46.8                                                             | 959 498                   | 184                                     | 47.2                                                              | 4 427 231                  | 775                                     | -41.8                                                             | 5 000 000                    | 1000                                    | -41.8                                                             |
| <b>Central Asia</b>                                     | (2 411 990 to 2 533 581)   | (178 to 197)                            | (-48.1 to -45.1)                                                  | (681 404 to 6 201 358)    | (131 to 148)                            | (18.9 to 15.4)                                                    | (1 133 810 to 3 762 701)   | (172 to 840)                            | (44.6 to 39.9)                                                    | (12 004 007 to 13 868 811)   | 1000                                    | (39.0 to 31.1)                                                    |
| <b>Albania</b>                                          | 535 500                    | 566                                     | -12.2                                                             | 118 437                   | 113                                     | 13.2                                                              | 653 937                    | 700                                     | -33.2                                                             | 700 000                      | 1000                                    | -33.2                                                             |
| <b>Armenia</b>                                          | (503 802 to 571 613)       | (334 to 364)                            | (45.6 to 38.2)                                                    | (84 146 to 158 821)       | (95 to 179)                             | (15.3 to 11.0)                                                    | (605 871 to 705 626)       | (647 to 756)                            | (44.6 to 34.2)                                                    | (12 004 007 to 13 868 811)   | 1000                                    | (39.0 to 31.1)                                                    |
| <b>Azerbaijan</b>                                       | 10 426                     | 128                                     | -58.9                                                             | 3 752                     | 103                                     | 22.6                                                              | 14 311                     | 217                                     | -53.7                                                             | 15 000 000                   | 1000                                    | -53.7                                                             |
| <b>Bulgaria</b>                                         | (9 780 to 11 166)          | (70 to 151)                             | (62.0 to 55.5)                                                    | (2 678 to 5 063)          | (73 to 138)                             | (25.2 to 20.2)                                                    | (12 951 to 15 697)         | (395 to 473)                            | (56.8 to 50.5)                                                    | (12 004 007 to 13 868 811)   | 1000                                    | (39.0 to 31.1)                                                    |
| <b>Czechia</b>                                          | (6 561 to 8 456)           | (246 to 322)                            | (68.8 to 58.2)                                                    | (8 631 to 10 237)         | (79 to 149)                             | (26.7 to 21.5)                                                    | (16 829 to 18 269)         | (342 to 447)                            | (62.4 to 52.5)                                                    | (12 004 007 to 13 868 811)   | 1000                                    | (39.0 to 31.1)                                                    |
| <b>Georgia</b>                                          | 31 281                     | 843                                     | -15.2                                                             | 7 508                     | 167                                     | 3.4                                                               | 38 789                     | 1 004                                   | -11.7                                                             | 40 000 000                   | 1000                                    | -11.7                                                             |
| <b>Kazakhstan</b>                                       | (28 756 to 33 469)         | (174 to 201)                            | (12.1 to 7.7)                                                     | (5 328 to 6 242)          | (114 to 127)                            | (1.3 to 5.7)                                                      | (35 400 to 42 005)         | 821                                     | (102 to 101)                                                      | (12 004 007 to 13 868 811)   | 1000                                    | (39.0 to 31.1)                                                    |
| <b>Kyrgyzstan</b>                                       | 126 987 to 150 230         | (85 to 89)                              | (42.8 to 31.9)                                                    | (21 882 to 41 541)        | (118 to 235)                            | (11.0 to 5.4)                                                     | (134 680 to 181 426)       | (835 to 990)                            | (138 to 78)                                                       | (12 004 007 to 13 868 811)   | 1000                                    | (39.0 to 31.1)                                                    |
| <b>Mongolia</b>                                         | (41 468 to 47 303)         | (644 to 742)                            | (52.7 to 43.6)                                                    | (5 321 to 9 963)          | (64 to 176)                             | (25.5 to 22.1)                                                    | (48 365 to 55 123)         | (763 to 885)                            | (49.6 to 42.8)                                                    | (12 004 007 to 13 868 811)   | 1000                                    | (39.0 to 31.1)                                                    |
| <b>Tajikistan</b>                                       | 28 756 to 33 469           | (174 to 201)                            | (12.1 to 7.7)                                                     | (5 328 to 6 242)          | (114 to 127)                            | (1.3 to 5.7)                                                      | (35 400 to 42 005)         | 821                                     | (102 to 101)                                                      | (12 004 007 to 13 868 811)   | 1000                                    | (39.0 to 31.1)                                                    |
| <b>Turkmenistan</b>                                     | 16 870                     | 323                                     | -37.2                                                             | 7 213                     | 125                                     | 22.5                                                              | 42 295                     | 468                                     | -48.0                                                             | 45 000 000                   | 1000                                    | -48.0                                                             |
| <b>Uzbekistan</b>                                       | (11 213 to 13 220)         | (117 to 137)                            | (53.3 to 39.3)                                                    | (15 178 to 16 649)        | (88 to 127)                             | (24.6 to 20.0)                                                    | (17 800 to 17 168)         | (42 000 to 42 168)                      | (42 000 to 42 168)                                                | (12 004 007 to 13 868 811)   | 1000                                    | (39.0 to 31.1)                                                    |
| <b>Central Europe</b>                                   | (15 455 to 16 228 368)     | (234 to 281)                            | (42.4 to 24.3)                                                    | (7 213 to 11 867)         | (22 to 173)                             | (8.3 to 2.1)                                                      | (21 020 to 27 048)         | (643 to 820)                            | (37.8 to 21.7)                                                    | (12 004 007 to 13 868 811)   | 1000                                    | (39.0 to 31.1)                                                    |
| <b>Albania</b>                                          | 431 449                    | 585                                     | -34.8                                                             | 344 644                   | 925                                     | -32.5                                                             | 775 199                    | 602                                     | -48.4                                                             | 800 000                      | 1000                                    | -48.4                                                             |
| <b>Bosnia and Herzegovina</b>                           | (417 232 to 447 586)       | (643 to 692)                            | (60.1 to 56.7)                                                    | (245 006 to 615 514)      | (159 to 303)                            | (14.2 to 10.9)                                                    | (676 615 to 893 787)       | (512 to 660)                            | (51.2 to 45.3)                                                    | (12 004 007 to 13 868 811)   | 1000                                    | (39.0 to 31.1)                                                    |
| <b>Bulgaria</b>                                         | 10 326                     | 389                                     | -39.2                                                             | 6 110                     | 173                                     | 7.5                                                               | 17 736                     | 588                                     | -28.7                                                             | 20 000 000                   | 1000                                    | -28.7                                                             |
| <b>Croatia</b>                                          | (8 669 311 to 9 616 500)   | (604 to 658)                            | (40.4 to 30.1)                                                    | (1 647 313 to 1 931 989)  | (107 to 123)                            | (16.4 to 14.6)                                                    | (5 596 311 to 6 201 358)   | (465 to 542)                            | (54.0 to 40.8)                                                    | (12 004 007 to 13 868 811)   | 1000                                    | (39.0 to 31.1)                                                    |
| <b>Czechia</b>                                          | 9 965                      | 285                                     | -10.3                                                             | 953                       | 200                                     | 48.4                                                              | 18 917                     | 53                                      | -25.4                                                             | 20 000 000                   | 1000                                    | -25.4                                                             |
| <b>Hungary</b>                                          | (9 003 to 10 955)          | (258 to 315)                            | (12.2 to 26.4)                                                    | (6 384 to 12 028)         | (144 to 270)                            | (42.2 to 54.8)                                                    | (16 400 to 22 029)         | (419 to 559)                            | (67.9 to 36.7)                                                    | (12 004 007 to 13 868 811)   | 1000                                    | (39.0 to 31.1)                                                    |
| <b>Macedonia</b>                                        | 28 756 to 33 469           | (174 to 201)                            | (12.1 to 7.7)                                                     | (5 328 to 6 242)          | (114 to 127)                            | (1.3 to 5.7)                                                      | (35 400 to 42 005)         | 821                                     | (102 to 101)                                                      | (12 004 007 to 13 868 811)   | 1000                                    | (39.0 to 31.1)                                                    |
| <b>Poland</b>                                           | 31 491                     | 307                                     | -56.2                                                             | 37 482                    | 264                                     | 0.3                                                               | 68 973                     | 401                                     | -40.8                                                             | 70 000 000                   | 1000                                    | -40.8                                                             |
| <b>Romania</b>                                          | (29 160 to 33 352)         | (284 to 311)                            | (58.7 to 52.2)                                                    | (28 756 to 33 469)        | (187 to 355)                            | (2.1 to 10.1)                                                     | (38 220 to 53 221)         | (632 to 660)                            | (43.1 to 36.3)                                                    | (12 004 007 to 13 868 811)   | 1000                                    | (39.0 to 31.1)                                                    |
| <b>Serbia</b>                                           | 21 004                     | 211                                     | -71.1                                                             | 2 824                     | 207                                     | 11.1                                                              | 34 812                     | 484                                     | -67.3                                                             | 40 000 000                   | 1000                                    | -67.3                                                             |
| <b>Slovakia</b>                                         | (26 282 to 31 991)         | (185 to 315)                            | (73.4 to 48.1)                                                    | (140 to 16 770)           | (140 to 16 770)                         | (66.3 to 64.9)                                                    | (46 361 to 64 193)         | (101 to 557)                            | (64.5 to 57.9)                                                    | (12 004 007 to 13 868 811)   | 1000                                    | (39.0 to 31.1)                                                    |
| <b>Slovenia</b>                                         | 4 819                      | 317                                     | -82.5                                                             | 1 327                     | 193                                     | 8.8                                                               | 12 206                     | 509                                     | -43.1                                                             | 15 000 000                   | 1000                                    | -43.1                                                             |
| <b>Ukraine</b>                                          | (6 101 to 7 563)           | (84 to 151)                             | (40.4 to 24.3)                                                    | (7 213 to 11 867)         | (23 to 260)                             | (5.1 to 6.6)                                                      | (10 434 to 14 097)         | (444 to 583)                            | (29.1 to 14.8)                                                    | (12 004 007 to 13 868 811)   | 1000                                    | (39.0 to 31.1)                                                    |
| <b>Belarus</b>                                          | 2 262                      | 355                                     | -49.8                                                             | 9 098                     | 218                                     | 3.0                                                               | 3 960                      | 577                                     | -20.7                                                             | 4 000 000                    | 1000                                    | -20.7                                                             |
| <b>Belgium</b>                                          | (2 033 to 2 571)           | (131 to 249)                            | (41.1 to 24.9)                                                    | (1 204 to 2 281)          | (151 to 291)                            | (4.0 to 6.5)                                                      | (4 401 to 6 051)           | (406 to 659)                            | (33.6 to 37.7)                                                    | (12 004 007 to 13 868 811)   | 1000                                    | (39.0 to 31.1)                                                    |
| <b>Denmark</b>                                          | 1 605                      | 414                                     | -62.2                                                             | 1 224                     | 148                                     | 14.8                                                              | 2 824                      | 654                                     | -52.5                                                             | 3 000 000                    | 1000                                    | -52.5                                                             |
| <b>Estonia</b>                                          | (149 216 to 171 897)       | (384 to 440)                            | (63.0 to 58.9)                                                    | (87 301 to 156 610)       | (170 to 223)                            | (17.2 to 12.4)                                                    | (246 920 to 325 727)       | (57 740 to 741)                         | (53.9 to 48.9)                                                    | (12 004 007 to 13 868 811)   | 1000                                    | (39.0 to 31.1)                                                    |
| <b>France</b>                                           | 85 554                     | 469                                     | -54.4                                                             | 54 275                    | 214                                     | 17.4                                                              | 119 811                    | 651                                     | -39.3                                                             | 120 000 000                  | 1000                                    | -39.3                                                             |
| <b>Germany</b>                                          | (80 033 to 91 685)         | (619 to 682)                            | (67.9 to 50.2)                                                    | (83 542 to 93 053)        | (146 to 178)                            | (20.2 to 14.8)                                                    | (122 100 to 159 527)       | (885 to 736)                            | (49.3 to 42.6)                                                    | (12 004 007 to 13 868 811)   | 1000                                    | (39.0 to 31.1)                                                    |
| <b>Greece</b>                                           | 38 951                     | 338                                     | -49.8                                                             | 23 100                    | 212                                     | 10.0                                                              | 50 000                     | 505                                     | -21.0                                                             | 60 000 000                   | 1000                                    | -21.0                                                             |
| <b>Hungary</b>                                          | (26 570 to 31 268)         | (88 to 339)                             | (64.7 to 52.9)                                                    | (15 724 to 29 615)        | (136 to 257)                            | (23.5 to 19.8)                                                    | (44 349 to 59 205)         | (446 to 736)                            | (55.6 to 28.3)                                                    | (12 004 007 to 13 868 811)   | 1000                                    | (39.0 to 31.1)                                                    |
| <b>Ireland</b>                                          | 18 115                     | 335                                     | -65.7                                                             | 15 426                    | 159                                     | 20.6                                                              | 33 941                     | 553                                     | -55.8                                                             | 35 000 000                   | 1000                                    | -55.8                                                             |
| <b>Italy</b>                                            | (16 558 to 19 000)         | (40 to 41)                              | (40.1 to 37.3)                                                    | (10 991 to 20 767)        | (153 to 195)                            | (22.3 to 10.0)                                                    | (28 812 to 38 859)         | (485 to 633)                            | (61.6 to 45.1)                                                    | (12 004 007 to 13 868 811)   | 1000                                    | (39.0 to 31.1)                                                    |
| <b>Japan</b>                                            | 5 538                      | 293                                     | -74.6                                                             | 7 400                     | 263                                     | 22.1                                                              | 13 339                     | 539                                     | -62.7                                                             | 15 000 000                   | 1000                                    | -62.7                                                             |
| <b>South Korea</b>                                      | (5 066 to 6 008)           | (287 to 322)                            | (77.0 to 71.8)                                                    | (5 222 to 9 901)          | (186 to 345)                            | (23.8 to 20.4)                                                    | (10 748 to 15 441)         | (474 to 631)                            | (64.3 to 59.1)                                                    | (12 004 007 to 13 868 811)   | 1000                                    | (39.0 to 31.1)                                                    |
| <b>Spain</b>                                            | 1 500 685                  | 787                                     | -40.7                                                             | 407 411                   | 727                                     | -41.4                                                             | 1 998 100                  | 966                                     | -43.0                                                             | 2 000 000                    | 1000                                    | -43.0                                                             |
| <b>Sweden</b>                                           | (9 780 to 11 166)          | (70 to 151)                             | (62.0 to 55.5)                                                    | (2 678 to 5 063)          | (73 to 138)                             | (25.2 to 20.2)                                                    | (12 951 to 15 697)         | (395 to 473)                            | (56.8 to 50.5)                                                    | (12 004 007 to 13 868 811)   | 1000                                    | (39.0 to 31.1)                                                    |
| <b>Switzerland</b>                                      | (4 417 to 5 583)           | (246 to 322)                            | (68.8 to 58.2)                                                    | (8 631 to 10 237)         | (79 to 149)                             | (26.7 to 21.5)                                                    | (16 829 to 18 269)         | (342 to 447)                            | (62.4 to 52.5)                                                    | (12 004 007 to 13 868 811)   | 1000                                    | (39.0 to 31.1)                                                    |
| <b>United Kingdom</b>                                   | 8 407                      | 73.6                                    | -73.6                                                             | 4 950                     | 171                                     | 12.98                                                             | 1 171                      | 613                                     | -68.2                                                             | 1 200 000                    | 1000                                    | -68.2                                                             |
| <b>USA</b>                                              | (7 351 to 9 509)           | (87 to 99)                              | (77.1 to 69.8)                                                    | (1 240 to 1 731)          | (121 to 230)                            | (34.0 to 31.6)                                                    | (11 350 to 14 721)         | (519 to 684)                            | (17.1 to 64.8)                                                    | (12 004 007 to 13 868 811)   | 1000                                    | (39.0 to 31.1)                                                    |
| <b>Canada</b>                                           | 12 581                     | 454                                     | -10.7                                                             | 1 097                     | 138                                     | 24.1                                                              | 3 946                      | 611                                     | -43.3                                                             | 4 000 000                    | 1000                                    | -43.3                                                             |
| <b>Australia</b>                                        | (11 548 to 13 781)         | (87 to 99)                              | (77.1 to 69.8)                                                    | (1 240 to 1 731)          | (121 to 230)                            | (34.0 to 31.6)                                                    | (11 350 to 14 721)         | (519 to 684)                            | (17.1 to 64.8)                                                    | (12 004 007 to 13 868 811)   | 1000                                    | (39.0 to 31.1)                                                    |
| <b>China</b>                                            | 39 563                     | 449                                     | -54.4                                                             | 54 275                    | 214                                     | 17.4                                                              | 119 811                    | 651                                     | -39.3                                                             | 120 000 000                  | 1000                                    | -39.3                                                             |
| <b>India</b>                                            | (8 407 to 10 900)          | (619 to 682)                            | (67.9 to 50.2)                                                    | (83 542 to 93 053)        | (146 to 178)                            | (20.2 to 14.8)                                                    | (122 100 to 159 527)       | (885 to 736)                            | (49.3 to 42.6)                                                    | (12 004 007 to 13 868 811)   | 1000                                    | (39.0 to 31.1)                                                    |
| <b>Russia</b>                                           | (18 412 to 20 843)         | (88 to 339)                             | (64.7 to 52.9)                                                    | (15 724 to 29 615)        | (136 to 257)                            | (23.5 to 19.8)                                                    | (44 349 to 59 205)         | (446 to 736)                            | (55.6 to 28.3)                                                    | (12 004 007 to 13 868 811)   | 1000                                    | (39.0 to 31.1)                                                    |
| <b>South Africa</b>                                     | 1 101 491                  | 762                                     | -41.4                                                             | 351 97                    |                                         |                                                                   |                            |                                         |                                                                   |                              |                                         |                                                                   |

| Location                               | YLLs (95% UI)         |                                         |                                                                   | YLDs (95% UI)          |                                         |                                                                   | DALYs (95% UI)             |                                         |                                                                   |
|----------------------------------------|-----------------------|-----------------------------------------|-------------------------------------------------------------------|------------------------|-----------------------------------------|-------------------------------------------------------------------|----------------------------|-----------------------------------------|-------------------------------------------------------------------|
|                                        | 2017 counts           | 2017 age-standardized rates per 100,000 | Percentage change in age-standardized rates between 1990 and 2017 | 2017 counts            | 2017 age-standardized rates per 100,000 | Percentage change in age-standardized rates between 1990 and 2017 | 2017 counts                | 2017 age-standardized rates per 100,000 | Percentage change in age-standardized rates between 1990 and 2017 |
| United Kingdom                         | 107 474               | 170                                     | 66.3                                                              | 90 613                 | 136                                     | 8.0                                                               | 198 087                    | 277                                     | 55.3                                                              |
| Latin America and Caribbean            | 5 342 907             | 889                                     | 37.8                                                              | 4 233 977              | 71                                      | 18.9                                                              | 5 744 044                  | 960                                     | 52.3                                                              |
| Andean Latin America                   | 1 336 650 (5 532 633) | 855 (5 929)                             | (39.6 to 34.3)                                                    | 895 404 (562 074)      | 51 (51.94)                              | (15.6 to 22.7)                                                    | 1 527 287 (5 975 477)      | 921 (5 995)                             | (37.3 to 32.1)                                                    |
| Bolivia                                | 475 226 (576 064)     | (770 to 839)                            | (40.8 to 25.6)                                                    | (388 to 411)           | (38.8 to 41.157)                        | (7.8 to 0.9)                                                      | 584 790 (608 328)          | (891 to 987)                            | (39.4 to 24.7)                                                    |
| Ecuador                                | 217 207               | 1 276                                   | 7.6                                                               | 10 313                 | 65                                      | 27.5                                                              | 1 276                      | 1 341                                   | 7.1                                                               |
| Peru                                   | 185 209 (242 896)     | 1 448 (1 427)                           | (17.6 to 3.9)                                                     | (7 889 to 18 856)      | (47 to 88)                              | (0.3 to 10.4)                                                     | 205 200 (253 126)          | (1 210 to 1 490)                        | (16.8 to 6.0)                                                     |
| Caribbean                              | 177 718 (246 077)     | (0.34 to 0.71)                          | (10.93 to 20.620)                                                 | (14 to 65)             | (14.0 to 65)                            | (8.7 to 0.8)                                                      | 192 770 (261 109)          | (80 to 73)                              | (44.8 to 27.1)                                                    |
| Antigua and Barbuda                    | 312                   | 342                                     | 41                                                                | 28 379                 | 38                                      | 2.8                                                               | 344                        | 382                                     | -1.5                                                              |
| The Bahamas                            | 2 942                 | 734                                     | -27.1                                                             | 202                    | 50                                      | 12.5                                                              | 1 447                      | 460                                     | -30.8                                                             |
| Barbados                               | 1 255                 | 424                                     | -33.6                                                             | 172                    | 45                                      | 14.7                                                              | 1 134                      | 324                                     | -24.9                                                             |
| Belize                                 | 1 130 (1 393)         | (81 to 469)                             | (41.0 to 25.1)                                                    | (122 to 235)           | (32 to 63)                              | (9.7 to 17.3)                                                     | (424 to 517)               | (38.0 to 22.8)                          |                                                                   |
| Bermuda                                | 241                   | 363                                     | 61.6                                                              | 59                     | 63                                      | 2.5                                                               | 300                        | 426                                     | 57.8                                                              |
| Cuba                                   | 2 426 274             | (0.17 to 0.41)                          | (47.1 to 55.5)                                                    | (42 to 80)             | (45 to 86)                              | (6.8 to 2.1)                                                      | (207 to 335)               | (57 to 48)                              | (43.0 to 52.1)                                                    |
| Dominica                               | 486 (607)             | (721 to 888)                            | (20 to 0.5)                                                       | (28 to 52)             | (35 to 65)                              | (22.9 to 8.6)                                                     | (533 to 648)               | (167 to 59.3)                           |                                                                   |
| Dominican Republic                     | 151 999               | 1 399                                   | 26.7                                                              | 7 140                  | 60                                      | 44.1                                                              | 140 005                    | 741                                     | 14.9                                                              |
| Grenada                                | 502                   | 444                                     | 44                                                                | 44                     | 51                                      | 6.7                                                               | 552                        | 484                                     | -11.4                                                             |
| Guyana                                 | 5 952                 | 763                                     | -68.8                                                             | (16 to 69)             | (29 to 44)                              | (2.6 to 10.3)                                                     | (564 to 607)               | (44 to 52)                              | (47.1 to 34.0)                                                    |
| Haiti                                  | 1 381 (2 694)         | (1 381 to 2 694)                        | (56.7 to 29.3)                                                    | (3 701 to 7 24)        | (38 to 69)                              | (16.5 to 5.9)                                                     | (1 381 to 2 694)           | (4 335 to 2 748)                        | (56.0 to 28.1)                                                    |
| Jamaica                                | 12 520                | 428                                     | 91.4                                                              | 1 324                  | 45                                      | 7.1                                                               | 13 844                     | 460                                     | 89.3                                                              |
| Puerto Rico                            | 16 178 (19 405)       | 482                                     | -4.4                                                              | 2 748                  | 55                                      | 5.0                                                               | 20 445                     | 538                                     | -45.6                                                             |
| Saint Lucia                            | 1 133                 | 606                                     | -59.7                                                             | 48                     | 57                                      | 1.4                                                               | 1 250                      | 559                                     | -37.9                                                             |
| Saint Vincent and the Grenadines       | 484 (592)             | (615 to 677)                            | (26.8 to 5.3)                                                     | (37 to 70)             | (29 to 55)                              | (45.0 to 40.4)                                                    | (537 to 645)               | (237 to 31.1)                           |                                                                   |
| Suriname                               | 4 729                 | 814                                     | -30.8                                                             | 346                    | 58                                      | 7.7                                                               | 5 075                      | 879                                     | -29.1                                                             |
| Trinidad and Tobago                    | 9 451                 | 669                                     | -13.0                                                             | 885                    | 53                                      | 18.2                                                              | 10 336                     | 733                                     | -11.3                                                             |
| Virgin Islands                         | 7 662 (11 523)        | (0.17 to 0.11)                          | (29.4 to 6.7)                                                     | (631 to 1 999)         | (88 to 127)                             | (14.8 to 9.1)                                                     | (8 546 to 12 409)          | (602 to 868)                            | (126.2 to 74.0)                                                   |
| Central Latin America                  | 1 913 816 (2 129 603) | (730 to 861)                            | (43.0 to 35.9)                                                    | (1 162 325 to 2 158)   | (47 to 87)                              | (1.5 to 8.7)                                                      | 2 065 742 (2 304 227)      | (791 to 882)                            | (40.9 to 33.9)                                                    |
| Colombia                               | 3 307                 | 677                                     | -48.7                                                             | 21 480                 | 42                                      | 20.0                                                              | 47                         | 379                                     | 87                                                                |
| Costa Rica                             | 3 391                 | 685                                     | -18.8                                                             | 2 642                  | 53                                      | 7.3                                                               | 3 583                      | 738                                     | -17.5                                                             |
| El Salvador                            | 50 528 (57 273)       | (818 to 752)                            | (126.2 to 9.9)                                                    | (3 720 to 3 589)       | (57 to 72)                              | (2.2 to 9.5)                                                      | (33 153 to 40 219)         | (87 to 88)                              | (124.8 to 8.8)                                                    |
| Guatemala                              | 1 393 998             | 806                                     | -32.4                                                             | 7 744                  | 62                                      | 19.4                                                              | 1 445 643                  | 67                                      | 849                                                               |
| Honduras                               | 61 489                | 675                                     | -52.7                                                             | 3 753                  | 51                                      | 15.5                                                              | 65 242                     | 727                                     | -40.6                                                             |
| Mexico                                 | 976 016               | 754                                     | -42.4                                                             | 99 919                 | 20.7                                    | 1 075 935                                                         | 80                         | 39.3                                    |                                                                   |
| Nicaragua                              | 944 200 (1 009 136)   | (730 to 780)                            | (44.9 to 40.2)                                                    | (2 369 to 3 354)       | (58 to 107)                             | (16.2 to 24.7)                                                    | (1 032 221 to 1 125 009)   | (801 to 873)                            | (42.0 to 37.0)                                                    |
| Panama                                 | 27 313 (38 084)       | (262 to 586)                            | (61.7 to 47.0)                                                    | (1 359 to 2 539)       | (25 to 47)                              | (29.2 to 23.0)                                                    | (29 279 to 39 776)         | (60 to 61)                              | (60.3 to 46.2)                                                    |
| Venezuela                              | 288 684 (415 649)     | (92 to 133)                             | (40.2 to 14.1)                                                    | (45 to 163)            | (31 to 60)                              | (1.8 to 9.6)                                                      | (318 999 to 421 718)       | (635 to 813)                            | (47.4 to 30.1)                                                    |
| Tropical Latin America                 | 2 266 569             | 983                                     | -38.1                                                             | 203 116                | 84                                      | 10.4                                                              | 2 469 684                  | 1 068                                   | -33.3                                                             |
| Brazil                                 | 2 166 976 (2 350 324) | (942 to 1 019)                          | (40.9 to 34.7)                                                    | (1 446 305 to 2 450)   | (81 to 133)                             | (34.4 to 46.1)                                                    | (2 356 260 to 2 573 388)   | (1 020 to 1 133)                        | (38.2 to 31.5)                                                    |
| Paraguay                               | 7 482                 | 1 569                                   | -38.6                                                             | 4 482                  | 71                                      | 19.3                                                              | 7 933                      | 1 130                                   | -39.1                                                             |
| North Africa and Middle East           | 6 854 817             | 1 117                                   | -47.8                                                             | 545 368                | 100                                     | 25.4                                                              | 7 399 686                  | 1 217                                   | -46.5                                                             |
| Algeria                                | 1 312 639             | 1 604                                   | -68.5                                                             | 1 952                  | 88                                      | 17.1                                                              | 1 309 382                  | 217                                     | -27.7                                                             |
| Bahrain                                | 408 616 (3 60 361)    | (57.8 to 2 044)                         | (57.8 to 114.9)                                                   | (1 146 to 1 624)       | (55 to 115)                             | (1.8 to 15.3)                                                     | (424 930 to 449 158)       | (1 400 to 2 278)                        | (65.6 to 99.1)                                                    |
| Egypt                                  | 1 394 257             | 1 450                                   | -46.9                                                             | 91 138                 | 24.8                                    | 1 485 396                                                         | 1 563                      | -45.8                                   |                                                                   |
| Iran                                   | 1 069 676 (3 705 353) | (1078 to 1 796)                         | (53.7 to 36.0)                                                    | (55 455 to 121 801)    | (82 to 151)                             | (28.2 to 20.9)                                                    | (1 137 770 to 1 797 040)   | (1 189 to 1 915)                        | (54.0 to 35.4)                                                    |
| Iraq                                   | 1 022 382 (1 320 805) | (1 239 to 1 358)                        | (60.2 to 50.9)                                                    | (63 929 to 120 908)    | (76 to 143)                             | (39.4 to 33.9)                                                    | (1 097 622 to 1 207 599)   | (1 318 to 1 463)                        | (59.3 to 48.8)                                                    |
| Jordan                                 | 187 186 (249 504)     | (41 to 545)                             | (49.4 to 47.2)                                                    | (31 920 to 29 459)     | (47 to 87)                              | (40.2 to 37.1)                                                    | (219 788 to 272 385)       | (167 to 46.3)                           |                                                                   |
| Kuwait                                 | 62 672                | 571                                     | -56.7                                                             | 5 995                  | 68                                      | 39.6                                                              | 68 668                     | 640                                     | -55.4                                                             |
| Lebanon                                | 26 056                | 52.4                                    | 4.8                                                               | 4 890                  | 30.7                                    | 30 946                                                            | 728                        | 50.0                                    |                                                                   |
| Libya                                  | 2 369 (2 810)         | (50 to 664)                             | (56.7 to 47.8)                                                    | (4 546 to 5 561)       | (82 to 154)                             | (32.3 to 28.9)                                                    | (2 812 to 3 794)           | (53.9 to 46.7)                          |                                                                   |
| Morocco                                | 1 986 440 (3 538)     | (2 35 to 400)                           | (66.8 to 33.8)                                                    | (1 456 to 8 171)       | (60 to 115)                             | (7.5 to 5.0)                                                      | (2 608 to 42 383)          | (309 to 494)                            | (59.0 to 25.5)                                                    |
| Oman                                   | 45 129 (2 128 25)     | (63 to 10.4)                            | (55.2 to 10.3)                                                    | (86 to 122)            | (86 to 122)                             | (30.6 to 24.3)                                                    | (52 875 to 137 103)        | (741 to 908)                            | (53.2 to 10.9)                                                    |
| Qatar                                  | 140 805               | 978                                     | -48.1                                                             | 39 353                 | 23.6                                    | 10 993                                                            | 1 093                      | -46.5                                   |                                                                   |
| Saudi Arabia                           | 270 424 (3 705 594)   | (72 to 152)                             | (50.2 to 24.5)                                                    | (25 329 to 7 344)      | (71 to 133)                             | (1.6 to 15.2)                                                     | (304 516 to 600 031)       | (86 to 162)                             | (50.3 to 37.2)                                                    |
| Tunisia                                | 20 407                | 55.6                                    | 2.4                                                               | 2 104                  | 13.8                                    | 22 510                                                            | 402                        | -52.8                                   |                                                                   |
| United Arab Emirates                   | 1 760 (2 234)         | (10 to 465)                             | (43.8 to 48.1)                                                    | (1 508 to 3 171)       | (43 to 76)                              | (16.2 to 11.6)                                                    | (1 962 to 26 050)          | (468 to 576)                            | (40.7 to 45.1)                                                    |
| Yemen                                  | 1 201 318             | 1 201                                   | -50.6                                                             | 1 148                  | 148                                     | 198.5                                                             | 1 201                      | 2 226                                   | 86.1                                                              |
| East Asia                              | 82 385 (1 213 131)    | (1 835 to 2 434)                        | (63.3 to 47.8)                                                    | (4 967 to 9 471)       | (118 to 227)                            | (41.0 to 35.3)                                                    | (89 480 to 128 151)        | (1 833 to 2 606)                        | (63.9 to 41.4)                                                    |
| China                                  | 29 261                | 1 028                                   | -40.9                                                             | 4 002                  | 25                                      | 11.76                                                             | 33 312                     | 88                                      | -38.9                                                             |
| India                                  | 23 711 (30 323)       | (82 to 130)                             | (54.0 to 24.5)                                                    | (4 967 to 9 455)       | (105 to 198)                            | (28.2 to 23.1)                                                    | (27 958 to 40 040)         | (97 to 140)                             | (51.5 to 24.6)                                                    |
| Nepal                                  | 1 592 079             | 1 518                                   | -32.6                                                             | 49 572                 | 116                                     | 26.9                                                              | 1 641 652                  | 1 674                                   | -31.1                                                             |
| Sri Lanka                              | 416 802 (728 032)     | (1 066 to 1 848)                        | (15.6 to 9.7)                                                     | (55 023 to 86 865)     | (113 to 121)                            | (30.4 to 29.5)                                                    | (468 425 to 781 643)       | (1 200 to 2 003)                        | (54.0 to 32.6)                                                    |
| Sudan                                  | 1 523                 | 1 523                                   | -59.5                                                             | 11 009                 | -24.3                                   | 6 977 001                                                         | 582                        | -58.2                                   |                                                                   |
| Syria                                  | 489 970 (915 010)     | (1 162 to 2 254)                        | (68.8 to 38.3)                                                    | (22 738 to 40 606)     | (82 to 147)                             | (26.5 to 22.3)                                                    | (523 043 to 958 518)       | (1 271 to 2 380)                        | (46.8 to 37.4)                                                    |
| Turkey                                 | 64 449 (96 767)       | (58 to 552)                             | (63.5 to 37.9)                                                    | (45 to 85)             | (45 to 85)                              | (26.5 to 20.2)                                                    | (73 930 to 106 944)        | (430 to 614)                            | (60.7 to 36.4)                                                    |
| Tunisia                                | 147 868               | 1 277                                   | -44.7                                                             | 11 246                 | 89                                      | 28.4                                                              | 159 124                    | 1 312                                   | -43.4                                                             |
| Turkey                                 | 118 453 (162 477)     | (98 to 159)                             | (58.2 to 29.5)                                                    | (8 300 to 15 162)      | (64 to 120)                             | (19.3 to 11.8)                                                    | (29 133 to 39 430)         | (1 065 to 1 389)                        | (56.6 to 28.9)                                                    |
| United Arab Emirates                   | 409 862               | 599                                     | -41.5                                                             | 61 122                 | 9.3                                     | 470 984                                                           | 576                        | -38.9                                   |                                                                   |
| Yemen                                  | 368 378 (512 221)     | (54 to 563)                             | (50.6 to 30.6)                                                    | (43 578 to 82 32)      | (49 to 84)                              | (14.2 to 3.5)                                                     | (424 967 to 519 859)       | (1 214 to 80)                           | (47.8 to 63.0)                                                    |
| South Asia                             | 129 504 (2 122 777)   | (1 483 to 2 214)                        | (68.8 to 57.1)                                                    | (13 397 to 25 192)     | (122 to 131)                            | (30.2 to 28.1)                                                    | (148 392 to 231 627)       | (1 431 to 2 475)                        | (43.3 to 4.9)                                                     |
| Bangladesh                             | 552 371               | 350                                     | -60.4                                                             | 88 360                 | 67                                      | 37.7                                                              | 640 631                    | 438                                     | -48.4                                                             |
| Bhutan                                 | 423 294 (65 550)      | (270 to 410)                            | (22.4 to 34.7)                                                    | (63 357 to 117 782)    | (43 to 80)                              | (31.3 to 44.8)                                                    | (517 224 to 762 357)       | (334 to 471)                            | (16.8 to 3.2)                                                     |
| India                                  | 2 551 (4 386)         | (264 to 435)                            | (71.7 to 47.5)                                                    | (478 to 889)           | (54 to 100)                             | (19.5 to 11.1)                                                    | (3 137 to 5 069)           | (3 343 to 5 139)                        | (67.5 to 44.3)                                                    |
| Nepal                                  | 8 861 905             | 1 174                                   | -7.9                                                              | 1 197 464              | 79                                      | 11 059 389                                                        | 804                        | -13.8                                   |                                                                   |
| Pakistan                               | 2 929 930 (3 959 839) | (662 to 751)                            | (42.6 to 35.1)                                                    | (870 274 to 1 601 533) | (67 to 123)                             | (26.5 to 30.2)                                                    | (10 346 661 to 12 237 667) | (7 513 to 8 553)                        | (60.8 to 50.7)                                                    |
| Sri Lanka                              | 1 630                 | 1 630                                   | -5.5                                                              | 23 707                 | 20                                      | 22.0                                                              | 1 630                      | 2 397                                   | 48.3                                                              |
| Taiwan (Province of China)             | 1 721 (2 154 539)     | (600 to 1 569)                          | (16.2 to 16.4)                                                    | (17 103 to 6 646)      | (65 to 120)                             | (17.4 to 28.0)                                                    | (1 978 to 478 580)         | (690 to 1 658)                          | (60.3 to 39.0)                                                    |
| Yemen                                  | 2 960 037             | 1 338                                   | -20.9                                                             | 202 885                | 119                                     | 48.0                                                              | 3 062 923                  | 1 457                                   | -22.8                                                             |
| Southeast Asia, East Asia, and Oceania | 18 792 732            | 1 441                                   | -20.1                                                             | 14 204                 | 142                                     | 60.7                                                              | 19 442                     | 1 589                                   | -16.4                                                             |
| American Samoa                         | 110 234               | (18 to 450)                             | (42.1 to 16.8)                                                    | (40 to 76)             | (78 to 145)                             | (39.3 to 48.3)                                                    | (229 to 297)               | (40 to 50)                              | (13.2 to 8.3)                                                     |
| Federated States of Micronesia         | 848                   | 134                                     | -14.4                                                             | 46 653                 | 101                                     | 11.9                                                              | 972                        | 114                                     | -7.9                                                              |
| Guam                                   | 1 319 (1 094)         | (52 to 104)                             | (47.7 to 7.9)                                                     | (91 to 165)            | (89 to 180)                             | (89.2 to 69.4)                                                    | (1 319 to 2 311)           | (662 to 1 199)                          | (69.8 to 31.2)                                                    |
| Fiji                                   | 434                   | 434                                     | -30.7                                                             | 991                    | 112                                     | 9.8                                                               | 71                         | 935                                     | 586                                                               |
| Guam                                   | 1 039                 | 624                                     | -14.0                                                             | 264                    | 34                                      | 36.3                                                              | 1 303                      | 772                                     | -26.0                                                             |
| Kiribati                               | 679                   | 539                                     | -29.9                                                             | 1 190                  | 100                                     | 99.9                                                              | 1 190                      | 100                                     | -99.9                                                             |
| Marshall Islands                       | 1 130 (1 312)         | (55 to 695)                             | (12.9 to 0.2)                                                     | (130 to 356)           | (100 to 199)                            | (67.4 to 77.4)                                                    | (1 144 to 1 445)           | (51.8 to 60.7)                          | (18.8 to 8.7)                                                     |
| Northern Mariana Islands               | 679                   | 539                                     | -29.9                                                             | 1 190                  | 100                                     | 99.9                                                              | 1 190                      | 100                                     | -99.9                                                             |
| Palau                                  | 679                   | 539                                     | -29.9                                                             | 1 190                  | 100                                     | 99.9                                                              | 1 190                      | 100                                     | -99.9                                                             |
| Taiwan (Province of China)             | 1 319 (1 094)         | (52 to 104)                             | (47.7 to 7.9)                                                     | (91 to 165)            | (89 to 180)                             | (89.2 to 69.4)                                                    | (1 319 to 2 311)           | (662 to 1 199)                          | (69.8 to 31.2)                                                    |
| Yemen                                  | 368 378 (512 221)     | (54 to 563)                             | (50.6 to 30.6)                                                    | (43 578 to 82 32)      | (49 to 84)                              | (14.2 to 3.5)                                                     | (424 967 to 519 859)       | (1 214 to 80)                           | (47.8 to 63.0)                                                    |

| Location                           | YLLs (95% UI)                                       |                                         |                                                                   | YLD (95% UI)                                   |                                         |                                                                   | DALYs (95% UI)                                      |                                         |                                                                   |
|------------------------------------|-----------------------------------------------------|-----------------------------------------|-------------------------------------------------------------------|------------------------------------------------|-----------------------------------------|-------------------------------------------------------------------|-----------------------------------------------------|-----------------------------------------|-------------------------------------------------------------------|
|                                    | 2017 counts                                         | 2017 age-standardized rates per 100,000 | Percentage change in age-standardized rates between 1990 and 2017 | 2017 counts                                    | 2017 age-standardized rates per 100,000 | Percentage change in age-standardized rates between 1990 and 2017 | 2017 counts                                         | 2017 age-standardized rates per 100,000 | Percentage change in age-standardized rates between 1990 and 2017 |
| Marshall Islands                   | 643<br>(486 to 781)                                 | 1136<br>(884 to 1375)                   | -14.7<br>(-33.5 to 6.4)                                           | 67<br>(49 to 80)                               | 141<br>(102 to 187)                     | 77.9<br>(72.9 to 83.4)                                            | 710<br>(565 to 852)                                 | 1277<br>(1024 to 1522)                  | 9.6<br>(-2.4 to 20.7)                                             |
| Northern Mariana Islands           | 210<br>(118 to 238)                                 | 468<br>(405 to 531)                     | -5.7<br>(-51.3 to -16.7)                                          | 45<br>(47 to 88)                               | 119<br>(85 to 161)                      | 15.3<br>(11.7 to 18.5)                                            | 275<br>(241 to 309)                                 | 386<br>(314 to 658)                     | 31.8<br>(44.7 to -11.3)                                           |
| Papua New Guinea                   | 15667<br>(119 944 to 186 373)                       | 1467<br>(1136 to 2047)                  | -27.8<br>(-43.8 to -9.5)                                          | 276<br>(7.6 to 13 788)                         | 150<br>(109 to 196)                     | 10.3<br>(9.0 to 11.6)                                             | 2403<br>(105 57 to 795)                             | 1814<br>(10 355 to 197 795)             | 18.4<br>(-139.5 to 0.0)                                           |
| Samoa                              | 887<br>(681 to 1230)                                | 467<br>(339 to 654)                     | -23.6<br>(-43.0 to -7.7)                                          | 210<br>(152 to 280)                            | 130<br>(84 to 174)                      | 70.9<br>(66.2 to 75.6)                                            | 1097<br>(874 to 1466)                               | 597<br>(475 to 784)                     | -13.2<br>(-32.0 to 6.8)                                           |
| Solomon Islands                    | 6476<br>(5 041 to 8 202)                            | 1036<br>(802 to 1318)                   | -17.7<br>(-36.9 to 6.1)                                           | 137<br>(48 to 266)                             | 659<br>(482 to 866)                     | 71.7<br>(67.8 to 75.6)                                            | 1176<br>(631 to 1884)                               | 671<br>(428 to 1000)                    | -12.4<br>(-34.8 to 10.1)                                          |
| Tonga                              | 475<br>(466 to 669)                                 | 975<br>(651 to 1451)                    | -5.1<br>(-30.9 to 21.4)                                           | 38<br>(71 to 130)                              | 109<br>(78 to 145)                      | 109<br>(61.5 to 172.6)                                            | 473<br>(362 to 774)                                 | 671<br>(562 to 775)                     | 3.1<br>(-22.0 to 27.1)                                            |
| Vanuatu                            | 2810<br>(1 964 to 3 958)                            | 984<br>(683 to 1394)                    | -15.2<br>(-33.2 to 6.9)                                           | 147<br>(93 to 250)                             | 506<br>(255 to 859)                     | 106<br>(79 to 138)                                                | 1150<br>(790 to 1611)                               | 1130<br>(824 to 1546)                   | -4.4<br>(-25.0 to 16.9)                                           |
| <b>Southeast Asia</b>              | <b>5 997 044</b><br><b>(5 065 758 to 7 274 664)</b> | <b>793</b><br><b>(740 to 849)</b>       | <b>-44.5</b><br><b>(-48.6 to -40.4)</b>                           | <b>947 946</b><br><b>(85 044 to 2 042 282)</b> | <b>30.7</b><br><b>(101 to 187)</b>      | <b>-30.7</b><br><b>(-26.1 to -35.1)</b>                           | <b>3 944 900</b><br><b>(5 922 887 to 6 975 553)</b> | <b>933</b><br><b>(872 to 994)</b>       | <b>-39.3</b><br><b>(-40.0 to -38.9)</b>                           |
| Cambodia                           | 189 636<br>(147 941 to 246 258)                     | 1177<br>(927 to 1521)                   | -11.7<br>(-61.6 to -26.4)                                         | 20 076<br>(14 577 to 26 553)                   | 100<br>(70 to 135)                      | -20.0<br>(-38.8 to -48.7)                                         | 209 712<br>(169 546 to 267 770)                     | 1137<br>(1 069 to 1 274)                | -40.5<br>(-51.9 to -22.7)                                         |
| Indonesia                          | 1 741 795<br>(1 609 611 to 1 877 236)               | 666<br>(614 to 716)                     | -56.1<br>(-60.6 to -50.9)                                         | 380 600<br>(277 973 to 500 869)                | 146<br>(106 to 192)                     | -52.9<br>(-59.0 to -46.8)                                         | 2 122 608<br>(1 949 446 to 2 398 442)               | 182<br>(176 to 188)                     | -20.4<br>(-55.2 to 44.7)                                          |
| Laos                               | 91 583<br>(67 617 to 132 384)                       | 1 270<br>(841 to 1 866)                 | -48.8<br>(-61.7 to -30.2)                                         | 9 663<br>(7 038 to 12 751)                     | 148<br>(119 to 216)                     | -35.6<br>(-50.3 to -20.3)                                         | 103 196<br>(77 452 to 133 909)                      | 143<br>(109 to 178)                     | -48.4<br>(-57.4 to -26.0)                                         |
| Malaysia                           | 318 204<br>(279 583 to 356 887)                     | 980<br>(849 to 1 207)                   | -26.7<br>(-41.9 to -12.0)                                         | 54 667<br>(38 905 to 72 566)                   | 181<br>(129 to 244)                     | -37.6<br>(-50.4 to -24.4)                                         | 372 872<br>(329 287 to 412 096)                     | 1161<br>(1 026 to 1 294)                | -21.0<br>(-32.5 to -8.3)                                          |
| Maldives                           | 1093 to 2696<br>(720 to 1296)                       | 241 to 577<br>(211 to 277)              | -17.5<br>(-74.7 to 37.4)                                          | 134 to 651<br>(74 710 to 57 410)               | 864<br>(344 to 651)                     | -86.4<br>(-6.0 to 18.7)                                           | 1093 to 2696<br>(544 to 1388)                       | 656<br>(420 to 890)                     | -50.0<br>(-67.8 to -32.5)                                         |
| Mauritius                          | 6 572 to 7 954<br>(5 382 to 7 954)                  | 689 to 931<br>(489 to 931)              | -26.3 to -2.9<br>(-38.3 to -10.4)                                 | 106 to 126<br>(88 to 126)                      | 159 to 159<br>(83 to 250)               | -15.9 to 15.9<br>(-8.8 to 76.1)                                   | 6 572 to 7 954<br>(5 382 to 7 954)                  | 689 to 931<br>(489 to 931)              | -26.3 to -2.9<br>(-38.3 to -10.4)                                 |
| Myanmar                            | 440 388 to 644 129<br>(518 459 to 644 129)          | 154 to 174<br>(101 to 174)              | -60.7 to -61.7<br>(-69.7 to -61.7)                                | 47 763 to 87 499<br>(47 763 to 87 499)         | 91 to 166<br>(91 to 166)                | -77.3 to -37.7<br>(-77.3 to -37.7)                                | 440 388 to 644 129<br>(503 422 to 644 129)          | 125 to 125<br>(92 to 125)               | -66.7 to -31.8<br>(-56.7 to -31.8)                                |
| Philippines                        | 5 548 459<br>(4 801 643 to 6 641 064)               | 537<br>(461 to 643)                     | -13.9<br>(-13.1 to 10.5)                                          | 84 893<br>(60 124 to 113 113)                  | 113<br>(66 to 132)                      | -75.0<br>(-68.1 to -71.7)                                         | 5 548 459<br>(5 050 162 to 7 291 720)               | 627<br>(484 to 712)                     | -20.1<br>(-44.8 to 3.1)                                           |
| Sri Lanka                          | 101 980<br>(82 471 to 124 188)                      | 451<br>(350 to 550)                     | -39.0<br>(-51.3 to -30.0)                                         | 25 584<br>(18 250 to 34 564)                   | 139<br>(75 to 143)                      | -59.0<br>(-66.4 to -50.8)                                         | 101 980<br>(82 471 to 124 188)                      | 451<br>(350 to 550)                     | -39.0<br>(-51.3 to -30.0)                                         |
| Seychelles                         | 406<br>(394 to 418)                                 | 587<br>(468 to 648)                     | -18.7<br>(-19.5 to 3.4)                                           | 148<br>(103 to 193)                            | 129<br>(89 to 169)                      | -14.8<br>(-19.9 to 4.6)                                           | 406<br>(394 to 418)                                 | 587<br>(468 to 648)                     | -18.7<br>(-19.5 to 3.4)                                           |
| Thailand                           | 494 374<br>(375 651 to 1 002 113)                   | 1 261<br>(1 130 to 1 400)               | -10.6<br>(-15.1 to 3.0)                                           | 159 842<br>(112 132 to 213 026)                | 173<br>(122 to 233)                     | -39.4<br>(-46.2 to -32.6)                                         | 494 374<br>(375 651 to 1 002 113)                   | 1 261<br>(1 130 to 1 400)               | -10.6<br>(-15.1 to 3.0)                                           |
| Timor-Leste                        | 6 303<br>(3 256 to 12 323)                          | 479<br>(250 to 812)                     | -38.4<br>(-62.2 to -17.9)                                         | 1 095<br>(799 to 1440)                         | 109<br>(82 to 149)                      | -38.4<br>(-57.1 to -21.1)                                         | 6 303<br>(3 256 to 12 323)                          | 479<br>(250 to 812)                     | -38.4<br>(-62.2 to -17.9)                                         |
| Vietnam                            | 946 218<br>(775 249 to 1 078 257)                   | 931<br>(769 to 1 059)                   | -27.3<br>(-43.1 to -10.2)                                         | 143 072<br>(102 142 to 193 935)                | 139<br>(89 to 186)                      | -40.7<br>(-53.6 to -27.8)                                         | 946 218<br>(775 249 to 1 078 257)                   | 931<br>(769 to 1 059)                   | -27.3<br>(-43.1 to -10.2)                                         |
| <b>Sub-Saharan Africa</b>          | <b>4 154 768</b><br><b>(2 700 402 to 5 813 743)</b> | <b>985</b><br><b>(848 to 1 144)</b>     | <b>-37.0</b><br><b>(-43.8 to -26.3)</b>                           | <b>780 603</b><br><b>(666 020 to 833 203)</b>  | <b>182</b><br><b>(161 to 187)</b>       | <b>-37.0</b><br><b>(-42.6 to -30.4)</b>                           | <b>4 154 768</b><br><b>(2 700 402 to 5 813 743)</b> | <b>985</b><br><b>(848 to 1 144)</b>     | <b>-37.0</b><br><b>(-43.8 to -26.3)</b>                           |
| <b>Central sub-Saharan Africa</b>  | <b>2 000 402</b><br><b>(1 585 674 to 2 653 747)</b> | <b>1 564</b><br><b>(1 302 to 1 834)</b> | <b>-5.4</b><br><b>(-45.8 to 4.9)</b>                              | <b>334 044</b><br><b>(97 246 to 574 617)</b>   | <b>130</b><br><b>(174 to 180)</b>       | <b>-21.0</b><br><b>(-22.7 to -19.3)</b>                           | <b>2 000 402</b><br><b>(1 585 674 to 2 653 747)</b> | <b>1 564</b><br><b>(1 302 to 1 834)</b> | <b>-5.4</b><br><b>(-45.8 to 4.9)</b>                              |
| Angola                             | 418 203<br>(339 300 to 508 729)                     | 1 433<br>(1 183 to 1 744)               | -55.9<br>(-67.3 to -38.2)                                         | 1 433<br>(47 136 to 24 315)                    | 130<br>(24 315 to 236)                  | -55.9<br>(-80.1 to -36.0)                                         | 418 203<br>(339 300 to 508 729)                     | 1 433<br>(1 183 to 1 744)               | -55.9<br>(-67.3 to -38.2)                                         |
| Central African Republic           | 208 700<br>(117 070 to 282 738)                     | 437<br>(272 to 573)                     | -43.9<br>(-63.8 to -26.7)                                         | 160<br>(43 to 267)                             | 140<br>(117 to 211)                     | -43.9<br>(-63.8 to -26.7)                                         | 208 700<br>(117 070 to 282 738)                     | 437<br>(272 to 573)                     | -43.9<br>(-63.8 to -26.7)                                         |
| Congo (Brazzaville)                | 48 878<br>(23 308 to 87 489)                        | 1 887<br>(1 008 to 3 246)               | -48.8<br>(-65.8 to -28.0)                                         | 1 887<br>(491 to 2 867)                        | 172<br>(124 to 224)                     | -48.8<br>(-74.0 to -20.1)                                         | 48 878<br>(23 308 to 87 489)                        | 1 887<br>(1 008 to 3 246)               | -48.8<br>(-65.8 to -28.0)                                         |
| Congo (Kinshasa)                   | 2 488 193<br>(939 343 to 4 041 431)                 | 1 470<br>(1 130 to 1 836)               | -76.7<br>(-80.3 to -73.1)                                         | 83 702<br>(60 822 to 110 644)                  | 107<br>(70 to 191)                      | -76.7<br>(-74.0 to -71.1)                                         | 2 488 193<br>(939 343 to 4 041 431)                 | 1 470<br>(1 130 to 1 836)               | -76.7<br>(-80.3 to -73.1)                                         |
| DR Congo                           | 13 356<br>(9 170 to 18 797)                         | 989<br>(672 to 1416)                    | -71.9<br>(-81.2 to -64.6)                                         | 151<br>(55 to 278)                             | 133<br>(95 to 200)                      | -71.9<br>(-80.3 to -62.2)                                         | 13 356<br>(9 170 to 18 797)                         | 989<br>(672 to 1416)                    | -71.9<br>(-81.2 to -64.6)                                         |
| Equatorial Guinea                  | 13 356<br>(9 170 to 18 797)                         | 989<br>(672 to 1416)                    | -71.9<br>(-81.2 to -64.6)                                         | 151<br>(55 to 278)                             | 133<br>(95 to 200)                      | -71.9<br>(-80.3 to -62.2)                                         | 13 356<br>(9 170 to 18 797)                         | 989<br>(672 to 1416)                    | -71.9<br>(-81.2 to -64.6)                                         |
| Gabon                              | 4 885 884<br>(2 373 984 to 6 440 937)               | 786<br>(702 to 884)                     | -28.7<br>(-48.1 to -20.7)                                         | 286 273<br>(210 583 to 384 788)                | 115<br>(81 to 177)                      | -28.7<br>(-42.7 to -20.1)                                         | 4 885 884<br>(2 373 984 to 6 440 937)               | 786<br>(702 to 884)                     | -28.7<br>(-48.1 to -20.7)                                         |
| Burundi                            | 116 993<br>(51 887 to 154 123)                      | 1 278<br>(1 008 to 1 505)               | -12.8<br>(-20.0 to -6.9)                                          | 9 970<br>(7 204 to 13 144)                     | 104<br>(80 to 129)                      | -29.1<br>(-30.6 to -27.2)                                         | 116 993<br>(51 887 to 154 123)                      | 1 278<br>(1 008 to 1 505)               | -12.8<br>(-20.0 to -6.9)                                          |
| Comoros                            | 432<br>(406 to 458)                                 | 747<br>(617 to 918)                     | -48.7<br>(-59.3 to -34.6)                                         | 144<br>(61 to 104)                             | 80<br>(105 to 189)                      | -48.7<br>(-64.0 to -32.2)                                         | 432<br>(406 to 458)                                 | 747<br>(617 to 918)                     | -48.7<br>(-59.3 to -34.6)                                         |
| Djibouti                           | 914<br>(921 to 11 964)                              | 814<br>(594 to 1 184)                   | -11.4<br>(-53.5 to 3.1)                                           | 150<br>(93 to 125)                             | 130<br>(112 to 155)                     | -11.4<br>(-25.4 to 2.1)                                           | 914<br>(921 to 11 964)                              | 814<br>(594 to 1 184)                   | -11.4<br>(-53.5 to 3.1)                                           |
| Eritrea                            | 67 578<br>(49 990 to 84 884)                        | 786<br>(578 to 1 011)                   | -48.8<br>(-57.8 to -39.4)                                         | 786<br>(547 to 1 011)                          | 107<br>(66 to 127)                      | -48.8<br>(-57.8 to -39.4)                                         | 67 578<br>(49 990 to 84 884)                        | 786<br>(578 to 1 011)                   | -48.8<br>(-57.8 to -39.4)                                         |
| Ethiopia                           | 4 999 860<br>(4 597 150 to 5 653 743)               | 558<br>(459 to 658)                     | -41.3<br>(-49.0 to -33.1)                                         | 54 677<br>(39 120 to 72 351)                   | 107<br>(80 to 132)                      | -41.3<br>(-44.1 to -38.6)                                         | 4 999 860<br>(4 597 150 to 5 653 743)               | 558<br>(459 to 658)                     | -41.3<br>(-49.0 to -33.1)                                         |
| Kenya                              | 260 040<br>(236 646 to 301 931)                     | 638<br>(582 to 708)                     | -12.5<br>(-36.4 to 2.6)                                           | 44 930<br>(32 791 to 50 369)                   | 137<br>(100 to 181)                     | -12.5<br>(-47.0 to 2.2)                                           | 260 040<br>(236 646 to 301 931)                     | 638<br>(582 to 708)                     | -12.5<br>(-36.4 to 2.6)                                           |
| Madagascar                         | 1 798 056<br>(1 428 242 to 2 231 515)               | 790<br>(643 to 973)                     | -39.0<br>(-54.8 to -22.4)                                         | 846<br>(576 to 1 163)                          | 134<br>(87 to 177)                      | -39.0<br>(-54.8 to -22.4)                                         | 1 798 056<br>(1 428 242 to 2 231 515)               | 790<br>(643 to 973)                     | -39.0<br>(-54.8 to -22.4)                                         |
| Malawi                             | 1 033 973<br>(81 063 to 134 634)                    | 786<br>(616 to 875)                     | -28.7<br>(-46.0 to -11.6)                                         | 286 273<br>(17 307 to 13 009)                  | 115<br>(81 to 177)                      | -28.7<br>(-38.9 to 24.7)                                          | 1 033 973<br>(81 063 to 134 634)                    | 786<br>(616 to 875)                     | -28.7<br>(-46.0 to -11.6)                                         |
| Mozambique                         | 2 615 967<br>(215 287 to 3 100 386)                 | 1 059<br>(801 to 1 241)                 | -22.1<br>(-33.0 to -10.4)                                         | 21 330<br>(15 126 to 29 250)                   | 90<br>(55 to 155)                       | -22.1<br>(-37.6 to -16.7)                                         | 2 615 967<br>(215 287 to 3 100 386)                 | 1 059<br>(801 to 1 241)                 | -22.1<br>(-33.0 to -10.4)                                         |
| Rwanda                             | 127 399<br>(85 730 to 183 788)                      | 1 173<br>(890 to 1 666)                 | -49.8<br>(-64.9 to -30.4)                                         | 12 260<br>(8 811 to 16 285)                    | 142<br>(100 to 187)                     | -49.8<br>(-57.3 to -36.2)                                         | 127 399<br>(85 730 to 183 788)                      | 1 173<br>(890 to 1 666)                 | -49.8<br>(-64.9 to -30.4)                                         |
| Somalia                            | 207 001<br>(148 292 to 387 984)                     | 1 888<br>(1 013 to 2 714)               | -68.0<br>(-81.3 to -52.8)                                         | 17 193<br>(12 110 to 27 700)                   | 140<br>(117 to 211)                     | -68.0<br>(-74.0 to -62.0)                                         | 207 001<br>(148 292 to 387 984)                     | 1 888<br>(1 013 to 2 714)               | -68.0<br>(-81.3 to -52.8)                                         |
| South Sudan                        | 94 659<br>(66 486 to 129 489)                       | 1 019<br>(780 to 1 476)                 | -10.8<br>(-41.4 to 20.6)                                          | 9 575<br>(7 003 to 12 638)                     | 108<br>(102 to 112)                     | -10.8<br>(-2.2 to 2.0)                                            | 94 659<br>(66 486 to 129 489)                       | 1 019<br>(780 to 1 476)                 | -10.8<br>(-41.4 to 20.6)                                          |
| Tanzania                           | 2 282 880<br>(2 282 880 to 2 282 880)               | 578<br>(460 to 668)                     | -31.8<br>(-40.6 to -23.0)                                         | 37 505<br>(24 626 to 49 894)                   | 104<br>(78 to 138)                      | -31.8<br>(-37.5 to -26.1)                                         | 2 282 880<br>(2 282 880 to 2 282 880)               | 578<br>(460 to 668)                     | -31.8<br>(-40.6 to -23.0)                                         |
| Uganda                             | 402 286<br>(218 879 to 395 184)                     | 932<br>(672 to 1 201)                   | -12.0<br>(-29.8 to 5.8)                                           | 29 551<br>(21 376 to 29 296)                   | 129<br>(94 to 170)                      | -12.0<br>(-37.6 to 13.6)                                          | 402 286<br>(218 879 to 395 184)                     | 932<br>(672 to 1 201)                   | -12.0<br>(-29.8 to 5.8)                                           |
| Zambia                             | 1 099 155<br>(91 767 to 1 330 069)                  | 1 099<br>(885 to 1 451)                 | -10.9<br>(-41.0 to -16.2)                                         | 751<br>(695 to 17 119)                         | 116<br>(84 to 153)                      | -10.9<br>(-26.9 to 23.5)                                          | 1 099 155<br>(91 767 to 1 330 069)                  | 1 099<br>(885 to 1 451)                 | -10.9<br>(-41.0 to -16.2)                                         |
| <b>Southern sub-Saharan Africa</b> | <b>1 063 288</b><br><b>(929 641 to 1 085 527)</b>   | <b>725</b><br><b>(618 to 837)</b>       | <b>-31.8</b><br><b>(-51.0 to -38.0)</b>                           | <b>243 396</b><br><b>(86 231 to 324 411)</b>   | <b>90</b><br><b>(75 to 103)</b>         | <b>-31.8</b><br><b>(-35.7 to -32.0)</b>                           | <b>1 063 288</b><br><b>(929 641 to 1 085 527)</b>   | <b>725</b><br><b>(618 to 837)</b>       | <b>-31.8</b><br><b>(-51.0 to -38.0)</b>                           |
| Botswana                           | 15 369<br>(3 005 to 27 446)                         | 677<br>(579 to 786)                     | -36.3<br>(-49.0 to -23.0)                                         | 2 264<br>(1 624 to 3 034)                      | 82<br>(52 to 133)                       | -36.3<br>(-54.0 to -18.6)                                         | 15 369<br>(3 005 to 27 446)                         | 677<br>(579 to 786)                     | -36.3<br>(-49.0 to -23.0)                                         |
| Lesotho                            | 42 944<br>(3 785 to 53 052)                         | 237<br>(172 to 262)                     | -23.7<br>(-38.6 to -9.4)                                          | 2 440<br>(1 777 to 3 238)                      | 147<br>(108 to 195)                     | -23.7<br>(-32.0 to 19.7)                                          | 42 944<br>(3 785 to 53 052)                         | 237<br>(172 to 262)                     | -23.7<br>(-38.6 to -9.4)                                          |
| Namibia                            | 18 332 to 30 356<br>(16 969 to 18 332)              | 1 011<br>(722 to 1 296)                 | -97.0<br>(-51.2 to -18.9)                                         | 2 657<br>(1 913 to 3 541)                      | 139<br>(89 to 183)                      | -97.0<br>(-124.0 to -19.5)                                        | 1                                                   |                                         |                                                                   |
